1 **Long noncoding RNA *AVAN* promotes antiviral innate immunity by interacting with**  
2 **TRIM25 and enhancing the transcription of FOXO3a**

3

4 Chengcai Lai<sup>1,7, #</sup>, Lihui Liu<sup>2, 3, #</sup>, Qinghua Liu<sup>2, 3, 4, #</sup>, Sijie Cheng<sup>5, #</sup>, Keyu Wang<sup>1, 6</sup>, Lingna  
5 Zhao<sup>1</sup>, Min Xia<sup>1</sup>, Cheng Wang<sup>6</sup>, Hongjing Gu<sup>1</sup>, Yueqiang Duan<sup>1</sup>, Zhongpeng Zhao<sup>1</sup>, Lili  
6 Zhang<sup>2,3,8</sup>, Ziyang Liu<sup>2,3,8</sup>, Jianjun Luo<sup>2,3</sup>, Jianxun Song<sup>9</sup>, Penghui Yang<sup>1,5, \*</sup>, Runsheng Chen<sup>2,</sup>  
7 <sup>3, 6, \*</sup>, Xiliang Wang<sup>1, \*</sup>

8 <sup>1</sup> State Key Laboratory of Pathogens and Biosecurity, Beijing Institute of Microbiology and  
9 Epidemiology, Beijing 100071, China

10 <sup>2</sup> Key Laboratory of RNA Biology, Institute of Biophysics, Chinese Academy of Sciences,  
11 Beijing 100101, China

12 <sup>3</sup> Beijing Key Laboratory of Noncoding RNA, Institute of Biophysics, Chinese Academy of  
13 Sciences, Beijing 100101, China

14 <sup>4</sup> Guangdong Geneway Decoding Bio-Tech Co. Ltd, Foshan 528316, China

15 <sup>5</sup> Beijing 302 Hospital, Beijing 100039, China

16 <sup>6</sup> Chinese PLA General Hospital, Beijing 100853, China

17 <sup>7</sup> NO.95316 Troops of PLA, Guangzhou, 510900, China

18 <sup>8</sup> University of Chinese Academy of Sciences, Beijing, 100049, China

19 <sup>9</sup> Microbial pathogenesis and Immunology, Texas A&M University College of Medicine,  
20 Hershey, TX 77843, USA

21 <sup>#</sup> These authors contributed equally to this work.

22 <sup>\*</sup> Correspondence author: X.W. ([xiliangw@126.com](mailto:xiliangw@126.com)), C.R. ([crs@sun5.ibp.ac.cn](mailto:crs@sun5.ibp.ac.cn)), or Y. P.

23 ([ypenghuiamms@hotmail.com](mailto:ypenghuiamms@hotmail.com))

24 **Abstract**

25 Accumulating evidence has shown that long noncoding RNAs (lncRNAs) are involved in  
26 several biological processes, including immune responses. However, the role of lncRNAs in  
27 antiviral innate immune responses remains largely unexplored. Here, we identify an  
28 uncharacterized human lncRNA, antiviral and activate neutrophil (*AVAN*), that is significantly  
29 up-regulated upon virus infection. Mechanistically, nuclear lncRNA-*AVAN* positively  
30 regulates the transcription of forkhead box O3A (*FOXO3a*) *in cis* by associating with its  
31 promoter and inducing chromatin remodeling to promote neutrophil chemotaxis. Furthermore,  
32 we also found that cytoplasmic lncRNA-*AVAN* directly binds tripartite motif containing 25  
33 (*TRIM25*) and enhances the association of *TRIM25* and Retinoic acid inducible gene-1  
34 proteins (*RIG-I*) and the ubiquitylation of *RIG-I*, thereby promoting *TRIM25*- and  
35 *RIG-I*-mediated antiviral innate immune signaling. Collectively, these findings highlight the  
36 potential clinical implications of lncRNA-*AVAN* as a key positive regulator of the antiviral  
37 innate immune response and a promising target for developing broad antiviral therapeutics.

38

39 **Keywords:** long noncoding RNA, *AVAN*, virus immunity, *FOXO3a*, *TRIM25*

40

## 41 **Introduction**

42 Long noncoding RNAs (lncRNAs), a large class of noncoding RNAs with no or limited  
43 coding potential, are defined as functional RNAs that participate in a wide range of biological  
44 processes, including cell and organ development, X-chromosome inactivation, tumor  
45 proliferation, genomic imprinting, and stem cell self-renewal (1-10). lncRNAs are also  
46 reportedly involved in innate and adaptive immune responses, such as immune cell  
47 proliferation and cytokine production (11-14). Previous studies have shown that lncRNAs  
48 exert their roles in regulating chromatin accessibility, mRNA stability and protein activity by  
49 interacting with chromatin DNA, mRNAs or proteins (15-18). With the discovery and  
50 characterization of an increasing number of lncRNAs, several mechanisms of these lncRNAs  
51 in virus-host interactions have been elucidated (19), however, many others remain  
52 uncharacterized.

53 Influenza A virus (IAV) is a leading cause of respiratory-related morbidity and mortality,  
54 posing a substantial threat to global health (20). However, some mechanisms underlying  
55 IAV-host interactions remain unclear. Neutrophils provide one of the early lines of innate  
56 immunity and defense against invading microorganisms, which contribute to the fine  
57 regulation of the inflammatory and antiviral immune responses (21-23). Increasing evidence  
58 suggests that neutrophils are also prominent components of the inflammatory and immune  
59 responses during virus infection. Neutrophils are rapidly recruited to sites of infection during  
60 the innate immune response to IAV (24-26). In addition, neutrophils can produce and release a  
61 large variety of cytokines and chemokines (22), which enables them to significantly influence  
62 antiviral defense (27). During virus infection, chemokines play a crucial role in neutrophil

63 activation and chemotaxis (28). However, how lncRNA functions in this process is largely  
64 unknown.

65 Intracellular RIG-I-like receptors (RLRs), namely, RIG-I, MDA5, and LGP2, are  
66 well-defined single-stranded viral RNA sensors that play a pivotal role in host antiviral  
67 activity by initializing the rapid production of type I interferons (IFN) and cytokines (29).  
68 RIG-I is a key sensor of paramyxoviruses, influenza virus, hepatitis C virus, and Japanese  
69 encephalitis virus (30). The binding of viral RNA to the RIG-I C-terminal regulatory domain  
70 results in a conformational change that, in turn, enables RIG-I binding to the signal adaptor  
71 MAVS (also called VISA, IPS-1, or CARDIF) through N-terminal caspase recruitment  
72 domains (CARDs). Such binding enhances the phosphorylation of IRF3 and eventually leads  
73 to the production of type I IFN and inflammatory cytokines (31). However, little is known  
74 about the roles of lncRNAs in IAV-infected patients or the mechanisms of lncRNA activity  
75 and host antiviral immune responses.

76 In this study, we profile the lncRNAs of IAV-infected patient neutrophils and identify a  
77 human lncRNA, designated *AVAN*, which plays a critical role in anti-IAV infection.  
78 Functional experiments demonstrate that *AVAN* up-regulates FOXO3a expression to promote  
79 neutrophil chemotaxis and recruitment. In addition, *AVAN* enhances the activation of the  
80 RIG-I-mediated antiviral response by directly binding to TRIM25. These results show that an  
81 unannotated lncRNA, *AVAN*, functions to maintain innate immune homeostasis of antiviral  
82 immunity during IAV infection.

## 83 **Results**

### 84 **LncRNA expression is regulated by the influenza A (H7N9) virus in human neutrophils.**

85 Neutrophils, the prototypic cells of the innate immune system, are reported to play a  
86 pivotal role in the innate immune response to IAV (21-23). To explore the roles of host  
87 lncRNAs during IAV infection, we profiled whole transcriptional alterations using RNA-Seq  
88 in neutrophil samples from patients infected with IAV in the acute stage and their matched  
89 recovery-stage samples (GSE108807). We identified a total of 404 differentially expressed  
90 protein-coding genes ( $FC > 2$ ,  $p < 0.05$ ), including 234 up-regulated and 170 down-regulated  
91 genes, in each patient sample (Fig S1). The differentially expressed genes were strongly  
92 associated with the immune response, inflammatory response and innate immune response  
93 according to Gene ontology (GO) analysis (Fig 1A). We then mapped the detected lncRNAs  
94 to the human genome (UCSC version hg19) and the NONCODE V3.0 database and found an  
95 average of 240 up-regulated (range from 164 to 357) and 193 down-regulated (range from  
96 158 to 257) novel lncRNAs in acute-stage influenza patients compared with their  
97 recovery-stage counterparts ( $FC > 2$ ,  $p < 0.05$ ) and subjected them to a cluster analysis (Fig 1B).  
98 To investigate the association between lncRNAs and IAV infection, *in silico* analysis  
99 identified 26 novel lncRNAs candidates with notably aberrant expression (Fig 1C). To  
100 confirm the expression of these lncRNAs, we separated the neutrophils and monocytes from  
101 healthy volunteers and infected the cells with IAV for 12 h and found that XLOC\_040025  
102 (AVAN) was most significantly up-regulated after IAV challenge (Fig 1D, E). We also infected  
103 human alveolar epithelial cells (A549) with IAV and measured the expression of the 26  
104 lncRNAs and found that AVAN was most strongly up-regulated after IAV infection (Fig 1F).

105

106 ***AVAN* is preferentially up-regulated following virus infection**

107 We then performed qRT-PCR to quantify *AVAN* expression in the RNA-Seq samples and  
108 found that the results were consistent with the RNA-Seq data (Fig S2A). Thus, *AVAN* was  
109 chosen for subsequent investigation. To further confirm the expression of *AVAN* in  
110 IAV-infected patients, we collected blood samples from 63 additional IAV-positive patients  
111 and measured the expression of *AVAN*, which was significantly up-regulated in the neutrophils  
112 of these patients (Fig 2A; Table S1). Similarly, *AVAN* was up-regulated in A549 cells after  
113 infection with multiple sub-strains of IAV and several other viruses, including Sendai virus  
114 (SeV) and respiratory syncytial virus (RSV) (Fig 2B). Moreover, *AVAN* expression was  
115 significantly up-regulated upon IAV challenge in a time- and dose-dependent manner in A549  
116 cells (Fig 2C, D). Moreover, *AVAN* expression was also significantly up-regulated in a time-  
117 and dose-dependent manner in the human promyelocytic leukemia cell line (HL60), which is  
118 often a substitute for neutrophils, upon IAV challenge (Fig S2B, C). Subcellular fractionation  
119 followed by qRT-PCR in IAV-infected A549 cells revealed that the amount of *AVAN* localized  
120 in the cytoplasm was nearly as same as the one in nucleus (Fig 2E, Fig S2D). Besides, we  
121 performed RNA fluorescence *in situ* hybridization (RNA-FISH) with two specific probes in  
122 IAV-uninfected and -infected A549 cells and found that *AVAN* localized in the cytoplasm and  
123 nucleus were almost the same abundance (Fig 2F). In addition, we constructed competitive  
124 association FISH to display the specific distribution of *AVAN*. When adding free  
125 labeling-probes, the fluorescent dye from biotin labeling-probes was weaken (Fig S2E). *AVAN*  
126 exhibits no protein-coding potential according to ORF finder (32) and the coding potential

127 calculator (33) (Fig S2F). Only one transcript variant (approximately 500 nt) of *AVAN* was  
128 found in A549 cells, and it was found to be up-regulated upon IAV infection using northern  
129 blot analysis (Fig 2G). The exact transcript length (517 nt) of *AVAN* was confirmed by 5' and  
130 3' RACE (Table S2), which revealed that *AVAN* is polyadenylated (Fig S2G). Taken together,  
131 lncRNA expression profiling of patient neutrophils during IAV infection identified a novel  
132 *AVAN* that was preferentially up-regulated in IAV-infected cell lines and patient neutrophils  
133 upon virus infection.

134

### 135 ***AVAN* is essential for antiviral immune responses and neutrophil chemotaxis during IAV** 136 **infection**

137 To evaluate the potential function of *AVAN*, we next analyzed the related gene  
138 coexpression networks from the sequencing data and performed gene set enrichment analysis  
139 (GSEA). Influenza viral RNA transcription and replication were negatively related to *AVAN*  
140 (Fig S3, Table S3-S8), suggesting that *AVAN* participates in innate antiviral immunity. To  
141 identify the functions of *AVAN*, we generated *AVAN*-overexpressing A549 cells (Fig 3A) and  
142 found that viral replication was strongly inhibited (Fig 3B). In contrast, virus titer was  
143 up-regulated following *AVAN* knockdown with two specific siRNAs (Fig 3H, I), indicating  
144 that *AVAN* enhances the regulation of antiviral immune responses.

145 Innate immunity provides the first line of defense against invading pathogens. The  
146 recognition of invading virus by pathogen-recognition receptors activates the innate immune  
147 system, resulting in the production of type I IFNs (IFN- $\alpha$  and IFN- $\beta$ ) and eliciting antiviral  
148 responses (34-36). Thus, we assessed whether *AVAN* regulates virus-induced type I IFN

149 production. The results of qRT-PCR indicate that *AVAN* overexpression increased IFN- $\alpha$  and  
150 IFN- $\beta$  transcript levels upon IAV infection compared with those of the control vector (Fig 3C).  
151 To confirm this result, we performed ELISA to measure IFN- $\alpha$  and IFN- $\beta$  protein expression  
152 and found that IFN- $\alpha$  and IFN- $\beta$  were strongly up-regulated in *AVAN*-overexpressing A549  
153 cells during IAV infection (Fig 3D). Conversely, these phenomena were abolished by  
154 knocking down *AVAN* (Fig 3J, K).

155 The above GSEA data and GO analysis showed that the genes related to *AVAN* were also  
156 significantly enriched in chemotaxis and immune cell activation (Fig S4A, Table S9, S10), the  
157 main components of innate immune responses. To explore the role of *AVAN* in chemotaxis, we  
158 collected culture supernatants of *AVAN*-overexpressing A549 cells and performed neutrophil  
159 transwell assays, which revealed that *AVAN* overexpression significantly up-regulated  
160 neutrophil chemotaxis during IAV infection (Fig 3E). These phenomena were disrupted by  
161 knocking down *AVAN* (Fig 3L). The chemokines interleukin-8 (CXCL8, IL-8) is potent  
162 neutrophil chemoattractant (37) and is released by a variety of lung cells, including  
163 macrophages and epithelial cells as well as neutrophils themselves (38). IL-8 primarily  
164 attracts neutrophils and induces them to release lysosomal enzymes, triggering the respiratory  
165 burst and increasing the expression of adhesion molecules on the cell surface (39). IL-8 is the  
166 primary cytokine involved in the recruitment of neutrophils to the site of damage or infection  
167 and plays a crucial role in acute inflammation by recruiting and mediating neutrophils and  
168 other cells (40). Thus, we determine whether *AVAN* altered IL-8 expression in A549 cells.  
169 *AVAN* overexpression increased IL-8 transcript and protein levels upon IAV infection  
170 compared with those of the control vector (Fig 3F, G); this was abolished upon *AVAN*



171 knockdown (Fig 3M, N). To verify our hypothesis, we next overexpressed or knocked down  
172 *AVAN* in HL60 cells (Fig S4C, E) and infected them with IAV. The cell samples were  
173 harvested at the indicated times, and transcript and protein levels of IL-8 were measured. The  
174 results from HL60 cells were consistent with those obtained in A549 cells (Fig S4D, F).  
175 Collectively, these data indicate that lncRNA-*AVAN* plays a vital role in antiviral responses by  
176 positively regulating type I IFN induction and neutrophil chemotaxis.

177

### 178 ***AVAN* up-regulates ISG and chemokine expression**

179 To verify the global influence of *AVAN* during virus infection and to gain further insight  
180 into *AVAN* activity, we performed cellular transcriptome profiling on A549 cells using cDNA  
181 microarrays and found that *AVAN* overexpression altered the expression of 81 genes after 14 h  
182 of BJ501 infection compared with control cells (Fig 4A, Table S11). Most of these divergent  
183 genes were associated with antiviral innate immune responses and inflammatory diseases  
184 according to Reactome pathway analysis (Fig 4B) and FunDO diseases analysis (Fig S5).  
185 Notably, genes associated with immune system IFN signaling and cytokine signaling were  
186 markedly up-regulated in cells with ectopic *AVAN* expression compared with control cells,  
187 including chemokines and ISGs (IFN stimulated genes) (Fig 4C). These significantly  
188 up-regulated genes, including *MX1*, *ISG15*, *IFIT2*, *OASL*, *IFIM3*, *TNFAIP3*, *CXCL2* and  
189 *CCL5*, were confirmed by qRT-PCR (Fig 4D). These data again reveal that *AVAN* strongly  
190 participates in antiviral innate immune processes and neutrophil chemotaxis.

191

### 192 ***AVAN* triggers FOXO3a expression in the nucleus to enhance neutrophil chemotaxis**

193       Recent studies have shown that divergent lncRNAs can positively regulate the  
194 transcription of nearby genes through chromatin remodeling (4,41-45). The genomic location  
195 of *AVAN* suggested that it was divergently transcribed from a position 500-bp upstream of the  
196 *FOXO3a* gene (Fig S2G). Interestingly, mRNA array data revealed that *FOXO3a* is  
197 significantly up-regulated following *AVAN* overexpression during IAV infection (Fig 4C). To  
198 investigate the role of *AVAN* in *FOXO3a* expression, we measured the abundances of  
199 *FOXO3a* after overexpressing or knocking down *AVAN* in A549 and HL60 cell lines. The  
200 overexpression of *AVAN* up-regulated *FOXO3a* transcription in A549 cells, consistent with its  
201 role in enhancing *FOXO3a* protein expression (Fig 5A; Fig S6A left). Conversely, knocking  
202 down *AVAN* down-regulated *FOXO3a* transcription and protein expression (Fig 5B; Fig S6A  
203 right). In addition, the results in HL60 were consistent with these observed in A549 cells (Fig  
204 S6B).

205       The association of *AVAN* with *FOXO3a* expression and the subcellular localization of  
206 *AVAN* in both the cytoplasm and nucleus (Fig 2E, F) prompted us to test whether *AVAN*  
207 interacts with the *FOXO3a* promoter. To this end, we conducted chromatin isolation by RNA  
208 purification (ChIRP) using antisense oligoes against *AVAN* followed by qPCR in BJ501  
209 -uninfected and -infected A549 cells and found that *AVAN* bound to sequences upstream of  
210 *FOXO3a* (Fig 5C, D, E). We further verified the potential role of *AVAN* in modulating  
211 chromatin modifications at the *FOXO3a* promoter region. Chromatin immunoprecipitation  
212 (ChIP)-qPCR revealed that ectopic *AVAN* expression increased Pol II binding, as well as  
213 H3K4me3 and H3K27ac levels, at the *AVAN*-coated *FOXO3a* promoter in virus infected A549  
214 cell (Fig 5F, G, H) and uninfected A549 cell (Fig S6D, E, F). In contrast, knocking down

215 *AVAN* decreased Pol II binding and H3K4me3 and H3K27ac accumulation (Fig 5I, J, K; Fig  
216 S6G, H, I).

217 Chemokines were markedly up-regulated in cells with ectopic *AVAN* expression (Fig 4C).  
218 A previous study reported that FOXO3a can regulate chemokine expression (46). To further  
219 investigate whether *AVAN*-promoted chemokines expression is associated with FOXO3a, we  
220 measured IL-8 expression in FOXO3a overexpressing A549 cells. Ectopic FOXO3a  
221 expression significantly promoted IL-8 expression and neutrophil chemotaxis during IAV  
222 infection (Fig 5L, N; Fig S6J). In contrast, knocking down FOXO3a decreased IL-8  
223 expression and neutrophil chemotaxis during IAV infection (Fig 5M, O; Fig S6K). In addition,  
224 we knocked down FOXO3a in *AVAN*-overexpressing A549 cells and found that knockdown  
225 abrogated *AVAN*-induced effects on IL-8 expression during IAV infection (Fig 5P). These data  
226 provide evidence that *AVAN* plays a critical role in regulating FOXO3a expression *in cis* by  
227 associating with the FOXO3a promoter and performing chromatin remodeling, which  
228 additionally increased IL-8 and neutrophil chemotaxis.

229

### 230 ***AVAN* direct binds to TRIM25 and enhances the TRIM25-mediated activation of RIG-I**

#### 231 **signaling**

232 Previous experiments demonstrated that *AVAN* is located in the cytoplasm (Fig 2E, 2F).  
233 To investigate the molecular mechanism of *AVAN* in the cytoplasm, RNA pull-down assays  
234 using biotin-labeled *AVAN* or *AVAN* antisense control followed by mass spectrometry (MS)  
235 analysis were performed. The E3 ubiquitin ligase TRIM25, an RNA-binding protein, was  
236 found to bind *AVAN* in IAV-infected A549 cells compared with the *AVAN* antisense control

237 (Fig 6A). This result was confirmed by *AVAN* RNA pull-down western blot experiments (Fig  
238 6B). Besides, ChIRP followed by western blot revealed that *AVAN*-specific probes could pull  
239 down TRIM25 while LacZ couldn't (Fig 6C). To validate the interaction between *AVAN* and  
240 TRIM25, we immunoprecipitated TRIM25 from IAV-infected A549 cells and quantified the  
241 protein-bound *AVAN*. Significantly higher levels of *AVAN* were detected with exogenous (Fig  
242 6D) and endogenous (Fig 6E) TRIM25 immunoprecipitation than with the isotype  
243 immunoglobulin G (IgG) control. Furthermore, we constructed Flag-tagged TRIM25  
244 truncated proteins containing the SPRY domain, B box/central coiled-coil domain (CCD), or  
245 RING domain and performed *AVAN* RNA pull-down western blot experiments. The results  
246 showed that only the B box/central CCD domain was involved in the *AVAN*-TRIM25  
247 association (Fig 6F). Furthermore, to explore the TRIM25 binding site on *AVAN* RNA, three  
248 truncated probes from *AVAN* were used for RNA pull-down assay. The result indicated that  
249 the TRIM25-binding activity mapped between nucleotides 1 and 200 (Fig 6G). Together,  
250 these findings indicate that *AVAN* physically interacts with TRIM25 and that the B box/central  
251 CCD of TRIM25 and 1-200nt of *AVAN* contribute to this association.

252 To test whether *AVAN* enhances the IFN-mediated antiviral innate immune response  
253 through TRIM25 and RIG-I signaling, we knocked down endogenous TRIM25 in HEK-293T  
254 cells and observed a markedly reduced effect of ectopic *AVAN* expression on the activation of  
255 IFNB1-responsive reporters in the context of IAV infection (Fig S7A). RIG-I is  
256 polyubiquitinated by TRIM25, which attaches K63-linked polyubiquitin to the sensor (47),  
257 Previous study showed that a stabilization of TRIM25-RIG-I interaction is important for a  
258 sustained antiviral IFN response (48). We next examined the effect of *AVAN* on the interaction

259 between TRIM25 and RIG-I. We found that ectopically expressing *AVAN* markedly enhanced  
260 the association between TRIM25 and RIG-I upon IAV infection (Fig 6H). Additionally,  
261 different fragments of *AVAN* were overexpressed in A549. We observed that P1(1-200nt)  
262 could enhance the association between TRIM25 and RIG-I, as full-length *AVAN*, while  
263 fragment P2+P3 (201-517nt) couldn't (Fig S7B). Moreover, endogenous or exogenous RIG-I  
264 ubiquitylation was significantly increased in *AVAN*-overexpressing cells in the context of IAV  
265 infection compared with the control vector (Fig 6I, J). Furthermore, we explored the impact of  
266 altered *AVAN* levels on RIG-I signaling. Total RIG-I protein levels did not differ significantly  
267 between *AVAN*-overexpressing and control cells. However, *AVAN* overexpression increased  
268 TBK1 and IRF3 phosphorylation upon IAV infection (Fig 6K, left). In contrast, *AVAN*  
269 knockdown abolished these changes (Fig 6K, right). To test whether *AVAN* enhances the  
270 IFN-mediated antiviral innate immune response through TRIM25 and RIG-I signaling, we  
271 performed qPCR analysis measuring IFN-alpha/beta upon *AVAN* transfection, and then  
272 individually knock down RIG-I or TRIM25. The results showed that knock down RIG-I or  
273 TRIM25 abrogated *AVAN*-induced effects on IFN-alpha/beta expression during IAV infection  
274 (Fig 6L, M, Fig S7C, D). Together, these data show that *AVAN* can enhance the interaction  
275 between TRIM25 and RIG-I and the ubiquitylation of RIG-I in the cytoplasm. Thus, we  
276 conclude that *AVAN* promotes TRIM25- and RIG-I-mediated antiviral innate immune  
277 signaling.

278

### 279 ***AVAN* protects mice from influenza A infection *in vivo***

280 To further investigate the *in vivo* effect of *AVAN* on IAV pathogenesis, we constructed an

281 AVAN-containing AAV2/9 vector and a control vector, which were then delivered into  
282 4-week-old C57L/B6 mice via intranasal (i.n.) administration. We found that AVAN was  
283 ectopically expressed in the lung of AAV2/9-AVAN treated mice (Fig 7A). Strikingly, after  
284 BJ501 infection, the groups pretreated with AAV2/9-AVAN exhibited significantly increased  
285 survival rates and reduced body weight loss at 10 days post-infection compared with the  
286 control group (Fig 7B, C). Furthermore, lung edema, measured as the wet-to-dry ratio of  
287 whole lung, was ameliorated (Fig 7D), and improved lung histopathology was observed in  
288 infected mice pretreated with AAV2/9-AVAN (Fig 7E, F). Moreover, the virus titer from the  
289 lungs of infected mice was also significantly reduced in AAV2/9-AVAN-treated mice  
290 compared with that in control mice (Fig 7G, H). Although AVAN triggers FOXO3a expression  
291 in the nucleus to enhance neutrophil chemotaxis *in vitro*, we did not observe that AVAN  
292 promotes FOXO3a expression *in vivo* (data not shown). This finding may result from the low  
293 conservation of AVAN between humans and mice. Consistent with the association in human,  
294 we found that AVAN also bind to rodent Trim25 through RNA pull-down using mouse tissue  
295 (Fig 7I). In addition, AAV2/9-AVAN promote type I IFN expression *in vivo* (Fig 7J). Taken  
296 together, these observations indicate that AVAN can ameliorate IAV-induced acute lung injury  
297 *in vivo* and protect mice from IAV infection.

298

## 299 **Discussion**

300       Recently, increasing evidence supports the importance of lncRNAs in host-virus  
301 interactions, and lncRNAs are an emerging paradigm in the regulation of innate immune  
302 responses. Previous studies have described several lncRNAs that are differentially expressed  
303 during viral infection, including in severe acute respiratory syndrome coronavirus  
304 (SARS-CoV)-infected mice, IAV-infected human lung cells and enterovirus 71  
305 (EV71)-infected rhabdomyosarcoma (RD) cells (49-51). However, little is known about the  
306 lncRNA profile of influenza patients. In this study, we profiled the transcriptome of  
307 neutrophils isolated from IAV-infected patients via RNA-Seq technology for the first time.  
308 Through a comprehensive analysis of these data, we identified 404 differentially expressed  
309 mRNAs and 433 differentially expressed noncoding RNAs in neutrophils of influenza patients.  
310 Among these highly expressed genes, we found an lncRNA named *AVAN* that plays a pivotal  
311 role in antiviral responses.

312       Several studies have shown that differentially expressed lncRNAs function as negative or  
313 positive regulators in various critical steps of the antiviral response (52). For example, BISPR  
314 lncRNA can regulate the antiviral IFN response through the induction of the expression of the  
315 genomically neighboring gene *BST2* *in cis*. Another IAV-associated intronic antisense  
316 lncRNA, negative regulator of antiviral response (NRAV), modulates antiviral responses by  
317 suppressing ISG transcription via altered histone modifications (53). A recent study show that  
318 lnc-Lsm3b can compete with viral RNAs in the binding of RIG-I monomers and involve in  
319 RIG-I-mediated antiviral response (54). In contrast, Herein, our data displayed that *AVAN* acts  
320 as a positive regulator in the antiviral response through two different mechanisms. In one

321 hand, cytoplasmic lncRNA-AVAN directly binds TRIM25 and enhances the association of  
322 TRIM25 and RIG-I and the ubiquitylation of RIG-I, thereby promoting TRIM25- and  
323 RIG-I-mediated antiviral innate immune signaling. In the other hand, nuclear lncRNA-AVAN  
324 positively regulates the transcription of forkhead box O3A (FOXO3a) *in cis* by associating  
325 with its promoter and inducing chromatin remodeling to enhance neutrophil chemotaxis.

326 FOXO3a is a member of the Forkhead box O (FoxO) family of transcription factors,  
327 which is a PTEN/PI3K/AKT effector functioning in diverse cellular activities such as the  
328 induction of cell-cycle arrest, stress resistance, apoptosis, differentiation, and metabolism  
329 (55-57). FOXO3a reportedly functions as a major transcriptional regulator in the maintenance  
330 of neutrophil activation during inflammation (58). However, little is known about the function  
331 of FOXO3a during the immune response in epithelial cells. Previous research demonstrated  
332 that FOXO3a repressed cytokine expression induced by LPS or bacteria (46). In this study,  
333 FOXO3a plays a different function during IAV infection. FOXO3a promotes IL-8 expression  
334 in IAV-infected A549 cells, which additionally enhances neutrophil chemotaxis. AVAN is  
335 located 1449-bp upstream of FOXO3a. We found that lncRNA-AVAN can markedly increase  
336 FOXO3a expression through chromatin remodeling in A549 cells. Additionally, AVAN can  
337 enhance neutrophil chemotaxis by upregulating the expression of IL-8. However, knockdown  
338 FOXO3a blocked the upregulation of IL-8 by AVAN. In the other hand, to confirm how much  
339 of the rise in the level of FOXO3a after AVAN overexpression is the result of enhanced IFN  
340 response, as opposed to a direct impact by AVAN on FOXO3a locus, we also used HL60 cells  
341 to evade IFN effects (data not shown here). Meanwhile, as seen in Figure 5, our data showed  
342 that there is a direct effect of AVAN on FOXO3a promoter and thereby enhanced Pol II



343 binding and H3K4me3 and H3K27ac accumulation. Of course, we would generate a mutant  
344 AVAN that can induce IFN response similar to WT AVAN but can't bind the FOXO3a  
345 promoter or change its expression level in subsequently studies. In addition, our results  
346 exhibited that neutrophils were isolated from fresh peripheral blood and were infected in vitro  
347 with influenza virus does not mimic their actual status in vivo. How and where AVAN is  
348 induced in neutrophils need to be further investigated. Thus, we propose that AVAN may  
349 enhance neutrophil chemotaxis through the regulation of FOXO3a expression. However, the  
350 detailed mechanism by which FOXO3a regulates the expression of chemokines requires  
351 further exploration.

352 Retinoic acid-inducible gene-I (RIG-I)-like receptors (RLRs) play a well-known role in  
353 RNA virus recognition (59). Previous reports have shown that RIG-I is the main host sensor  
354 involved in recognizing cytoplasmic viral RNA and subsequently initiating immune responses  
355 to eliminate infection. TRIM25, an E3 ubiquitin ligase, is critically important in the RIG-I  
356 signaling pathway. TRIM25 interacts with the CARD1 region of RIG-I and enhances RIG-I  
357 polyubiquitylation to initiate RIG-I-mediated antiviral responses (47). A previous study found  
358 that viruses have evolved sophisticated mechanisms to evade the host immune response  
359 through regulating the role of TRIM25. IAV nonstructural protein 1 (NS1) specifically  
360 inhibits TRIM25-mediated RIG-I CARD ubiquitination, thereby suppressing the RIG-I  
361 signaling pathway (60). Our results demonstrated that the host can also regulate TRIM25 to  
362 increase the immune response. AVAN can directly bind with the B box/central CCD of  
363 TRIM25 in A549 cells. Furthermore, the interaction of AVAN with TRIM25 promotes the  
364 association between TRIM25 and RIG-I and enhances RIG-I ubiquitylation, thereby

365 promoting IFN expression. It is worth noting that *AVAN* binds TRIM25 and facilitates IFN  
366 expression in mice. In addition, we explored the impact of *AVAN* overexpression or  
367 knockdown in IFN induction, chemo attraction of neutrophils or expression of cytokines and  
368 chemokines (Fig 3), speculated that lncRNA *AVAN* is critical in the IFN induction pathway.  
369 To the best of our knowledge, our work represents the first identification of lncRNA-*AVAN* as  
370 a novel partner of TRIM25 and demonstrates that *AVAN* suppresses IAV replication via  
371 TRIM25-RIG-I-dependent antiviral pathways.

372 In conclusion, we provide the first lncRNA landscape of IAV-infected patient neutrophils  
373 and identify the function of *AVAN*, a novel lncRNA, in the innate antiviral immune response.  
374 *AVAN* can enhance the chemotaxis of neutrophils by promoting FOXO3a expression *in cis*.  
375 On the one hand, *AVAN* can serve as a positive regulator of RIG-I signaling by directly  
376 binding TRIM25 and enhancing the association between TRIM25 and RIG-I *in trans*. (Fig 8).  
377 Of course, the mechanism of action of *AVAN in vivo* (transgenic mice) during IAV and its role  
378 in infection by other viruses warrant future investigations. Understanding the powerful roles  
379 of ubiquitous and versatile lncRNAs and identifying these IAV-related lncRNAs, especially  
380 the novel lncRNA-*AVAN*, may provide insights into the pathogenesis of viral infection, with  
381 lncRNA-*AVAN* potentially representing an essential target for intervention.

382

383 **Materials and methods**

384 **Cells and viruses**

385 A549 cells were cultured in DMEM/F12 (1:1) supplemented with 10% (v/v) FBS and  
386 penicillin-streptomycin (100 U/ml); 293T cells were cultured in DMEM/High Glucose  
387 supplemented with 10% (v/v) FBS and penicillin-streptomycin (100 U/ml); and HL60 and  
388 THP-1 cells were cultured in 1640 supplemented with 10% (v/v) FBS and  
389 penicillin-streptomycin (100 U/ml). The influenza virus A/Beijing/501/2009 (abbreviated as  
390 BJ501) and SeV used in this study were propagated by inoculation into 9 to 11-day-old  
391 specific pathogen-free (SPF) embryonated chicken eggs via the allantoic route as described  
392 previously. Virus stocks were aliquoted and stored at -80°C until use.

393

394 **Mice**

395 Pathogen-free 4-6-week-old female C57BL/6 mice were purchased from the Laboratory  
396 Animal Center, AMMS, Beijing, China. All procedures, including animal studies, were  
397 conducted following the National Guidelines for the Care of Laboratory Animals (2006-398)  
398 and performed in accordance with institutional regulations after protocol review and approval  
399 by the Institutional Animal Care and Use Committee of the Academy of Military Medical  
400 Sciences (project no. 2012-005). Mice were lightly anesthetized and subjected to i.n.  
401 inoculation with a tissue culture infective dose (TCID) of  $10^5$  TCID<sub>50</sub> of BJ501 influenza  
402 virus in a volume of 20 µl per mouse. Control mice were inoculated with 20 µl of allantoic  
403 fluid. Inoculated mice were maintained under SPF conditions and monitored daily for weight  
404 loss and mortality or infection for 14 days post-infection. Survival rate, body weight changes,

405 histological examination and acute lung edema (wet-to-dry ratio) were determined as  
406 described previously (61,62). The number of infiltrating inflammatory cells was counted and  
407 presented as the number of cell per 200× field.

408

#### 409 **RNA interference**

410 A549 and HL60 cells were transfected with siRNA targeting *AVAN*, *FOXO3a*, *TRIM25* and  
411 *RIG-I* using jetPRIME (Polyplus) according to the manufacturer's instructions. Two shRNA  
412 were also used to knockdown *AVAN* in A549 cells. The siRNA and shRNA sequences used in  
413 the experiments are listed in Supplementary Table S12.

414

#### 415 **Neutrophils and monocyte isolation**

416 Neutrophils and monocyte were isolated from fresh peripheral blood using Percoll PLUS (GE  
417 healthcare) according to the instructions supplied by the manufacturer. For neutrophils  
418 collection, briefly, fresh peripheral blood was taken from IAV patients and healthy human  
419 donors and layered on a 2-step Percoll PLUS gradient (75% and 60%), then centrifuged at  
420 500× *g* for 25 minutes. The cells at the interface between 75% and 60% were collected and  
421 washed twice with PBS and re-suspended in RPMI-1640 medium (Gibco) supplemented with  
422 10% FBS and 100 U/ml penicillin-streptomycin at 37°C in a humidified atmosphere of 5%  
423 (v/v) CO<sub>2</sub>.

424

#### 425 **ELISA**

426 Cytokines levels were measured using an ELISA kit (Dakewe, Beijing).

427

#### 428 **Neutrophil chemotaxis assay**

429 *In vitro* chemotactic assays were performed in 24-well Millicell hanging-cell culture inserts  
430 (Millipore). Briefly, the cells were starved by incubation for 18-24 h prior to the assay in  
431 serum-free RPMI 1640 medium and then washed twice with sterile serum-free medium  
432 containing 0.5% BSA. The bottom wells were loaded with the supernatant from  
433 *AVAN*-overexpressing or knockdown A549 cells 24 h after BJ501 or PBS treatment to a final  
434 volume of 300  $\mu$ l. The top wells were loaded with neutrophils ( $10^6$  cells/ml; 250  $\mu$ l from RPMI  
435 suspension). The top and bottom wells were separated by a porous membrane (3- $\mu$ m pore  
436 size). A cover plate was added, and the cells were incubated for 1 h at 37°C with 5% CO<sub>2</sub>. At  
437 the end of the incubation period, the top wells were removed, and the number of cells in the  
438 bottom wells was counted using a cell counter. The results are expressed as relative neutrophil  
439 migration (number of cells from the tested group/number of cells from the corresponding  
440 control vehicles).

441

#### 442 **Antibodies and reagents**

443 The primary antibodies anti-RIG-I(D14G6), anti-TBK1(D1B4), anti-phospho-TBK1 (Ser172,  
444 D52C2), anti-IRF3(D6I4C), anti-phospho-IRF3 (Ser396,4D4G), anti- $\beta$ -Actin(13E5),  
445 anti-FOXO3a, anti-H3K4me3 and anti-rabbit IgG, were purchased from Cell Signaling  
446 Technology. Anti-Flag, anti-HA, anti-H3K27ac and anti-TRIM25 were purchased from Sigma.  
447 Anti-Pol II was purchased from Abcam. Streptavidin C1 Beads were purchased from  
448 Invitrogen. Protein A/G PLUS-Agarose were purchased from Santa Cruz. Protein A/G Beads

449 were purchased from Thermo Scientific. The western chemiluminescent HRP substrate was  
450 purchased from Millipore Corporation.

451

## 452 **Western blotting**

453 All cells were lysed in RIPA (Solarbio) supplemented with protease and phosphatase inhibitor  
454 cocktail (100×, Thermo Fisher) and lysed for 10 min on ice. The supernatant was mixed with  
455 1/4 volume of 5× loading dye. The mixtures were then heated at 95°C and stored at –80°C.  
456 The samples were separated by SDS-PAGE and transferred onto nitrocellulose membranes.  
457 The membranes were then blocked with 5% nonfat milk (BD) in 1× Tris-buffered saline and  
458 0.1% Triton 100 for 1 h while shaking at room temperature. Next, the membranes were  
459 incubated with primary antibodies and horseradish peroxidase–conjugated secondary  
460 antibodies. Bands were visualized using the Kodak film exposure detection system. The film  
461 was scanned, and the band intensity was analyzed using Quantity One software.

462

## 463 **Quantitative real-time PCR**

464 Total RNA was extracted from cultured cells using TRIzol reagent (Invitrogen). cDNA was  
465 generated by reverse transcription with commercial PrimeScript RT Master Mix (Takara).  
466 Primer pairs ([Table S12](#)) were designed using Primer Premier Software 5.0 (Premier Biosoft  
467 International, Palo Alto, CA) and synthesized by Invitrogen. Quantitative real-time PCR was  
468 performed in triplicate wells of a 96-well reaction plate on an ABI 7500 PCR System  
469 (Applied Biosystems). GAPDH was used as the endogenous control. The  $2^{-\Delta\Delta Ct}$  method was  
470 used to calculate expression relative to the internal control. The data were analyzed using ABI

471 7500 SDS software v.1.3.

472

### 473 **Luciferase assays**

474 For IFNB1 transcriptional activity assays, 100 ng of pGL3-IFNB1 luciferase plasmid was  
475 cotransfected with 20 ng of pRL-TK vector into the cells using jetPRIME Transfection  
476 reagent (Polyplus). At 24 h after transfection, the cells were harvested according to the  
477 manufacturer's protocol (Promega), and firefly and Renilla luciferase signals were measured  
478 using a dual luciferase reporter assay system (Promega) on a Promega GloMax 96 machine  
479 (Promega) according to the protocol provided by the manufacturer.

480

### 481 **Northern blotting**

482 For northern blotting, total RNA was isolated from A549 cells using TRIzol reagent. Probes  
483 (Custom LNA mRNA Detection) were designed and synthesized by Exiqon and were also  
484 used for FISH. Northern blotting was performed as described previously (45).

485

### 486 **5' and 3' RACE**

487 The 5' and 3' RACE analyses were performed using the SMARTer RACE 5'/3' Kit (Clontech)  
488 according to the manufacturer's instructions. The RACE PCR products were cloned into  
489 pMD-19Tvector (Takara) and sequenced.

490

### 491 **RNA pull-down assays**

492 RNA pull-downs were performed as described (45). *In vitro* biotin-labeled RNAs (IncAVAN

493 and its antisense RNA) were transcribed with biotin RNA labeling mix (Roche) and T7 RNA  
494 polymerase (Roche), treated with RNase-free DNase I (Promega) and purified using the  
495 RNeasy Mini Kit (QIAGEN). Biotinylated RNA was incubated with cell lysate, and  
496 precipitated proteins were separated via SDS-PAGE and subjected to MS.

497

#### 498 **RNA fluorescence *in situ* hybridization (RNA-FISH)**

499 RNA-FISH was performed as described previously(48). Hybridization was carried out using  
500 DNA probe sets (Biosearch Technologies) according to the protocol provided by Biosearch  
501 Technologies. Cells were observed on a FV1000 confocal laser microscope (Olympus).

502

#### 503 **RNA immunoprecipitation (RIP) and chromatin immunoprecipitation (ChIP) assays**

504 RIP assays were performed as described (48) with minor modification. Briefly, after  
505 incubation, the magnetic beads were washed with high salt lysis buffer (containing 500mM  
506 NaCl) 5 times. RIP products were analyzed by qRT-PCR using the primer pairs listed in Table  
507 S12. ChIP was performed as described (63). The ChIP-enriched FOXO3a promoter was  
508 quantified by qPCR using the primer pairs listed in Table S12.

509

#### 510 **ChIRP**

511 ChIRP was performed according to Chu *et al* (64). Briefly, seven non-overlapping antisense  
512 DNA probes targeting *AVAN* were designed (<http://www.singlemoleculefish.com>), and eight  
513 probes targeting *LacZ* were also designed as non-specific controls. All probes were  
514 biotinylated at the 3' end with an 18-carbon spacer arm (Invitrogen). 20 million cells were



515 cross-linked by 1% formaldehyde. Cross-linked cells were lysed in lysis buffer (50 mM Tris  
516 pH 7.0, 10 mM EDTA, 1% SDS, add DTT, PMSF, protease inhibitor, and RNase inhibitor  
517 before use) at 100mg/ml on ice for 10 min, and sonicated using Ultrasonic Cell Crusher on ice  
518 until the bulk of DNA smear is 100-500bp. The cell lysate was separated into two equal  
519 aliquots, one for hybridizing with probes targeting *AVAN*, and the other for probes targeting  
520 *LacZ* as control. Next, C-1 magnetic beads were added to the probe-chromatin mixture. After  
521 five total washes with washing buffer (2×SSC, 0.5% SDS, add DTT and PMSF before use),  
522 the beads were separated into two parts, 1/10 for RNA elution and 9/10 for DNA elution or  
523 protein elution. For elution of the RNA, the beads were treated with Protease K Buffer and  
524 RNA was extracted with Trizol reagent. For elution of the DNA, beads were treated with  
525 DNA Elution Buffer (50mM NaHCO<sub>3</sub>, 1% SDS, add 100ug/ml RNase A and 100U/ml RNase  
526 H before use), and then DNA was isolated via phenol:chloroform:isoamyl alcohol extraction  
527 and subjected to qPCR. For elution of the protein, beads were treated with β-mercaptoethanol  
528 at a final concentration of 2.5% in 1× NuPAGE LDS Sample Buffer (Life Technologies,  
529 NP0007) at 96 °C for 30 min.

530

### 531 **Statistical analyses**

532 All data are presented as the means ± SEM. Data were analyzed using Student's t test.  
533 Survival data were analyzed by Kaplan-Meier survival analysis, and single time-points were  
534 analyzed using ANOVA. All analyses are performed using InStat software (Version 5.0,  
535 GraphPad prism). p<0.05 was considered statistically significant.

536

537 **Acknowledgments**

538 This work was supported in part by funding from the National Programs for High Technology  
539 Research and Development of China (SS2015AA020924) , the National Major Research and  
540 Development Program of China (No. 2017YFC1200800) and the Natural Science Foundation  
541 of China (81771700).

542

543 **Author contributions**

544 Authors P.Y., R.C. and X.W. conceived and designed the experiments; C.L., L.L., Q.L., S.C.,  
545 K.W., L.Z., M.X. and H.G. performed the experiments; Y.D., C.W., Z.Z., L.Z., J. S., Z. L. and  
546 J.L. analyzed the data; and C.L., L.L., K.W. and Q.L. wrote the manuscript.

547

548 **Competing interests**

549 None of the authors have competing financial interests to declare.

550

551

552 **Fig legends**

553 **Fig 1 LncRNA expression is regulated by the influenza A virus**

554 (A) Gene ontology (GO) analysis of differentially expressed genes in IAV-infected patient  
555 neutrophils compared with their recovery-stage counterparts from RNA-seq data (FC>2;  
556 p<0.05). The top six most significantly enriched GO terms are shown.

557 (B) Cluster heat map showing differentially expressed lncRNAs in IAV-infected patient  
558 neutrophils compared with recovery-stage samples based on RNA-seq data (FC>2; p <0.05).

559 (C) Cluster heat map showing 26 lncRNA candidates selected via *in silico* analysis from the  
560 RNA-seq data (FC>2; p <0.05).

561 (D-E) The expression of 26 lncRNA candidates in neutrophils (D) and monocyte (E) from  
562 healthy volunteers stimulated with BJ501 (MOI=0.5) or mock for 12 h by qRT-PCR analysis  
563 (n=3; means ± SEM; \*p<0.05; \*\*p<0.01; \*\*\*p<0.001).

564 (F) The expression of 26 lncRNA candidates in A549 cells stimulated with BJ501 (MOI=1) or  
565 mock for 24 h by qRT-PCR analysis (n=3; means ± SEM; \*p<0.05; \*\*p<0.01; \*\*\*p<0.001).

566

567 **Fig 2 AVAN is highly expressed in viral infection**

568 (A) AVAN expression in IAV-infected patient neutrophils by qRT-PCR analysis (healthy  
569 controls=18; patients=63; \*p<0.05).

570 (B) AVAN expression in A549 cells infected with BJ501 (MOI=1), H5N1 (MOI=1), H7N9  
571 (MOI=1), PR8 (MOI=1), H3N2 (MOI=1), Sendai virus (SeV) (MOI=1), or respiratory  
572 syncytial virus (RSV) (MOI=1) for 24 h by qRT-PCR analysis.

573 (C and D) AVAN expression in A549 cells infected with BJ501 at an MOI of 1 for the

574 indicated times (C) or at the indicated MOIs for 24 h (D) by qRT-PCR analysis.  
575 (E) Fractionation of BJ501-infected A549 cells followed by qRT-PCR analysis. The U1 and  
576 U6 RNAs served as positive controls for nuclear gene expression. The ACTIN and GAPDH  
577 RNAs served as positive controls for cytoplasmic gene expression. N, nuclear fraction; C,  
578 cytoplasmic fraction.  
579 (F) AVAN intracellular localization visualized by RNA-FISH in A549 cells stimulated with  
580 MOCK (left) or BJ501 (MOI=1) (right) for 24 h. DAPI, 4',6-diamidino-2-phenylindole.  
581 Probe 1 and 2, AVAN. Scale bar, 10  $\mu$ m.  
582 (G) Northern blotting of *AVAN* in A549 cells treated with mock or BJ501 (MOI=1) at 24h  
583 post-infection.

584

585 **Fig 3 Altered *AVAN* expression has profound effects on type I interferon and neutrophil**  
586 **chemotaxis.**

587 (A) The efficiency of *AVAN* overexpression was determined by qRT-PCR in BJ501-infected  
588 A549 cells.  
589 (B and D) BJ501 replication in *AVAN*-overexpressing (B) and *AVAN*-knockdown (I) A549 cells  
590 examined by the TCID<sub>50</sub> assay (MOI=1). The virus titers in supernatants were measured at 24  
591 h post-infection.  
592 (C, D, J and K) IFN- $\alpha$  and IFN- $\beta$  expression in A549 cells measured by qRT-PCR and ELISA  
593 (MOI=1) at 24 h post-infection.  
594 (E and L) Transwell assay of neutrophil migration in *AVAN*-overexpressing or  
595 *AVAN*-knockdown A549 culture supernatants.

596 (F and M) IL-8 expression in A549 cells were measured by qRT-PCR (MOI=1) at 24 h  
597 post-infection.

598 (G and N) IL-8 expression in A549 cells were measured by ELISA (MOI=1) at 24 h  
599 post-infection.

600 (H) The efficiency of AVAN knockdown was determined by qRT-PCR in BJ501-uninfected or  
601 -infected A549 cells.

602

#### 603 **Fig 4 AVAN up-regulates ISG and chemokine expression**

604 (A) Cluster heat map showing altered mRNA expression in AVAN-overexpressing A549 cells  
605 and EV control A549 cells infected with BJ501 (MOI=1) for 14 h by cDNA microarray (n=3;  
606 FC>1.3; p<0.05).

607 (B) Reactome pathway analysis of the altered mRNA expression from the cDNA microarray  
608 analysis.

609 (C) Cluster heat map showing the altered expression of mRNAs involved with ISGs and  
610 cytokine mRNAs that were up-regulated during AVAN overexpression.

611 (D) The mRNA levels of selected genes in AVAN-overexpressing A549 cells and EV control  
612 A549 cells infected with BJ501 (MOI=1) for 14 h by qRT-PCR analysis.

613

#### 614 **Fig 5 AVAN enhances FOXO3a expression *in cis***

615 (A and B) FOXO3a expression during virus infection in A549 cells were measured by  
616 qRT-PCR. A549 cells were transfected with AVAN plasmids (A) or siRNA (B).

617 (C) Enrichment of AVAN in ChIRP assay analyzed by qRT-PCR, U1 as a negative control.

618 (D and E) ChIRP assay showing that AVAN binds directly to the FOXO3a promoter and DNA  
619 in BJ501-uninfected (D) and -infected (E) A549 cells.

620 (F-K) H3K4me3 and H3K27ac levels and Pol II binding of the FOXO3a promoter were  
621 analyzed through ChIP followed by qRT-PCR in BJ501-infected A549 cells.

622 (L and M) Transwell assay of neutrophil migration in FOXO3a-overexpressing or  
623 FOXO3a-knockdown A549 culture supernatant.

624 (N and O) IL-8 expression in FOXO3a-overexpressing (N) or FOXO3a-knockdown (O) A549  
625 cells were measured by qRT-PCR.

626 (O) IL-8 expression in AVAN-overexpressing or/and FOXO3a-knockdown A549 cells were  
627 measured by qRT-PCR.

628

629 **Fig 6 AVAN direct binds to TRIM25 and enhances the antiviral immune response**

630 (A) RNA pull-down of AVAN-associated proteins using biotinylated AVAN or antisense  
631 probes. Isolated proteins were resolved by SDS-PAGE followed by silver staining.

632 (B) Pull-down western blot showing that AVAN can bind directly to TRIM25.

633 (C) ChIRP followed by western blot show that AVAN can bind to TRIM25.

634 (D and E) Exogenous (D) and endogenous (E) RIP of TRIM25 in BJ501 infected cells using  
635 anti-TRIM25 or anti-IgG antibodies. The relative enrichment fold of AVAN was calculated by  
636 qRT-PCR.

637 (F) AVAN pull-down western blot with lysates of A549 cells transfected with Flag,  
638 Flag-TRIM25, Flag-SPRY, Flag-B Box/CCD or Flag-Ring.

639 (G) Truncated AVAN pull-down, truncates (upper panel) were obtained via *in vitro*

640 transcription and incubated with BJ501-infected A549 lysates for RNA pulldown.

641 (H) TRIM25 co-immunoprecipitation with proteins from lysates of BJ501-infected A549 cells  
642 transfected with *AVANs*, followed by immunoblotting. Anti-TRIM25 and anti-RIG-I  
643 antibodies were used for immunoprecipitated.

644 (I) Immunoblot analysis of endogenous RIG-I ubiquitylation in control and  
645 *AVAN*-overexpressing A549 cells transfected with BJ501. Anti-RIG-I antibody was used for  
646 immunoprecipitated.

647 (J) Immunoblot analysis of proteins immunoprecipitated with anti-Flag from lysates of A549  
648 cells transfected with *AVAN*, HA-Ub and Flag-tagged RIG-I.

649 (K) Western blot analysis of RIG-I signaling in A549 cells transfected with *AVAN* or siRNAs.  
650 *AVAN* enhances RIG-I signaling activation.

651 (L and M) IFN-alpha (L) and IFN-beta (M) expression upon *AVAN* transfection in A549 cells  
652 that were infected by BJ501 or not (MOI=1) at 24h post-infection, and then individually  
653 knock down RIG-I or TRIM25, analyzed by qRT\_PCR.

654

### 655 **Fig 7 *AVAN* protects mice from virus infection**

656 (A) *AVAN* expression in the lung of AAV2/9-*AVAN*-treated or control mice measured by  
657 RT-PCR.

658 (B and C) Four-week-old wild-type B6 mice were inoculated with  $10^{5.125}$  TCID<sub>50</sub> BJ501 virus.  
659 Survival rates (B) and body weight changes (C) of wild-type mice (n=10 for each group) were  
660 monitored for 2 weeks after BJ501 challenge.

661 (D) Wet:dry ratios of lung tissues (n=6 for each group) at 5 DPI.

662 (E and F) HE-stained images (E) and infiltrating cell counts (F) (n=100 fields) in lung tissues

663 at 5 DPI (magnification=200×). \*p<0.05, \*\*p<0.01 and \*\*\*p<0.001.

664 (G and H) Lung HA titer (G) and virus titer (H) at 5 DPI (magnification=200×). \*p<0.05,

665 \*\*p<0.01.

666 (I) Immunoblot analysis showing that AVAN can bind to Trim25 *in vivo*.

667 (J) IFN- $\alpha$  and IFN- $\beta$  expression in the lung of mice treated with AAV2/9-AVAN or control

668 vector measured by qRT-PCR

669

670 **Fig 8 Schematic of the mechanisms by which AVAN regulates antiviral responses and**

671 **neutrophil chemotaxis.**

672



673 **References**

- 674 1. Fatica, A. and Bozzoni, I. (2014) Long non-coding RNAs: new players in cell differentiation and  
675 development. *Nature reviews. Genetics*, **15**, 7-21.
- 676 2. Batista, P.J. and Chang, H.Y. (2013) Long noncoding RNAs: cellular address codes in development and  
677 disease. *Cell*, **152**, 1298-1307.
- 678 3. Devaux, Y., Zangrando, J., Schroen, B., Creemers, E.E., Pedrazzini, T., Chang, C.P., Dorn, G.W., 2nd,  
679 Thum, T., Heymans, S. and Cardioline, n. (2015) Long noncoding RNAs in cardiac development and  
680 ageing. *Nature reviews. Cardiology*, **12**, 415-425.
- 681 4. Chen, C.K., Blanco, M., Jackson, C., Aznauryan, E., Ollikainen, N., Surka, C., Chow, A., Cerase, A.,  
682 McDonel, P. and Guttman, M. (2016) Xist recruits the X chromosome to the nuclear lamina to enable  
683 chromosome-wide silencing. *Science*, **354**, 468-472.
- 684 5. McHugh, C.A., Chen, C.K., Chow, A., Surka, C.F., Tran, C., McDonel, P., Pandya-Jones, A., Blanco,  
685 M., Burghard, C., Moradian, A. *et al.* (2015) The Xist lncRNA interacts directly with SHARP to silence  
686 transcription through HDAC3. *Nature*, **521**, 232-236.
- 687 6. Patil, D.P., Chen, C.K., Pickering, B.F., Chow, A., Jackson, C., Guttman, M. and Jaffrey, S.R. (2016)  
688 m(6)A RNA methylation promotes XIST-mediated transcriptional repression. *Nature*, **537**, 369-373.
- 689 7. Schmitt, A.M. and Chang, H.Y. (2016) Long Noncoding RNAs in Cancer Pathways. *Cancer cell*, **29**,  
690 452-463.
- 691 8. Lee, J.T. and Bartolomei, M.S. (2013) X-inactivation, imprinting, and long noncoding RNAs in health  
692 and disease. *Cell*, **152**, 1308-1323.
- 693 9. Xu, C., Zhang, Y., Wang, Q., Xu, Z., Jiang, J., Gao, Y., Gao, M., Kang, J., Wu, M., Xiong, J. *et al.*  
694 (2016) Long non-coding RNA GAS5 controls human embryonic stem cell self-renewal by maintaining  
695 NODAL signalling. *Nature communications*, **7**, 13287.
- 696 10. Zhou, J., Wang, D., Gao, R., Zhao, B., Song, J., Qi, X., Zhang, Y., Shi, Y., Yang, L., Zhu, W. *et al.*  
697 (2013) Biological features of novel avian influenza A (H7N9) virus. *Nature*, **499**, 500-503.
- 698 11. Satpathy, A.T. and Chang, H.Y. (2015) Long noncoding RNA in hematopoiesis and immunity.  
699 *Immunity*, **42**, 792-804.
- 700 12. Fitzgerald, K.A. and Caffrey, D.R. (2014) Long noncoding RNAs in innate and adaptive immunity.  
701 *Current opinion in immunology*, **26**, 140-146.
- 702 13. Carpenter, S., Aiello, D., Atianand, M.K., Ricci, E.P., Gandhi, P., Hall, L.L., Byron, M., Monks, B.,  
703 Henry-Bezy, M., Lawrence, J.B. *et al.* (2013) A long noncoding RNA mediates both activation and  
704 repression of immune response genes. *Science*, **341**, 789-792.
- 705 14. Chen, Y.G., Satpathy, A.T. and Chang, H.Y. (2017) Gene regulation in the immune system by long  
706 noncoding RNAs. *Nature immunology*, **18**, 962-972.
- 707 15. Holoch, D. and Moazed, D. (2015) RNA-mediated epigenetic regulation of gene expression. *Nature*  
708 *reviews. Genetics*, **16**, 71-84.
- 709 16. Yuan, J.H., Liu, X.N., Wang, T.T., Pan, W., Tao, Q.F., Zhou, W.P., Wang, F. and Sun, S.H. (2017) The  
710 MBNL3 splicing factor promotes hepatocellular carcinoma by increasing PXN expression through the  
711 alternative splicing of lncRNA-PXN-AS1. *Nature cell biology*, **19**, 820-832.
- 712 17. Pefanis, E., Wang, J., Rothschild, G., Lim, J., Kazadi, D., Sun, J., Federation, A., Chao, J., Elliott, O.,  
713 Liu, Z.P. *et al.* (2015) RNA exosome-regulated long non-coding RNA transcription controls  
714 super-enhancer activity. *Cell*, **161**, 774-789.
- 715 18. Mercer, T.R. and Mattick, J.S. (2013) Structure and function of long noncoding RNAs in epigenetic  
716 regulation. *Nature structural & molecular biology*, **20**, 300-307.

- 717 19. Jiang, M., Zhang, S., Yang, Z., Lin, H., Zhu, J., Liu, L., Wang, W., Liu, S., Liu, W., Ma, Y. *et al.* (2018)  
718 Self-Recognition of an Inducible Host lncRNA by RIG-I Feedback Restricts Innate Immune Response.  
719 *Cell*, **173**, 906-919 e913.
- 720 20. Everitt, A.R., Clare, S., Pertel, T., John, S.P., Wash, R.S., Smith, S.E., Chin, C.R., Feeley, E.M., Sims,  
721 J.S., Adams, D.J. *et al.* (2012) IFITM3 restricts the morbidity and mortality associated with influenza.  
722 *Nature*, **484**, 519-523.
- 723 21. Futosi, K., Fodor, S. and Mocsai, A. (2013) Reprint of Neutrophil cell surface receptors and their  
724 intracellular signal transduction pathways. *International immunopharmacology*, **17**, 1185-1197.
- 725 22. Tecchio, C., Micheletti, A. and Cassatella, M.A. (2014) Neutrophil-derived cytokines: facts beyond  
726 expression. *Frontiers in immunology*, **5**, 508.
- 727 23. Wang, K., Lai, C., Li, T., Wang, C., Wang, W., Ni, B., Bai, C., Zhang, S., Han, L., Gu, H. *et al.* (2017)  
728 Basic fibroblast growth factor protects against influenza A virus-induced acute lung injury by recruiting  
729 neutrophils. *Journal of molecular cell biology*.
- 730 24. Tumpey, T.M., Garcia-Sastre, A., Taubenberger, J.K., Palese, P., Swayne, D.E., Pantin-Jackwood, M.J.,  
731 Schultz-Cherry, S., Solorzano, A., Van Rooijen, N., Katz, J.M. *et al.* (2005) Pathogenicity of influenza  
732 viruses with genes from the 1918 pandemic virus: functional roles of alveolar macrophages and  
733 neutrophils in limiting virus replication and mortality in mice. *Journal of virology*, **79**, 14933-14944.
- 734 25. Perrone, L.A., Plowden, J.K., Garcia-Sastre, A., Katz, J.M. and Tumpey, T.M. (2008) H5N1 and 1918  
735 pandemic influenza virus infection results in early and excessive infiltration of macrophages and  
736 neutrophils in the lungs of mice. *PLoS pathogens*, **4**, e1000115.
- 737 26. Baskin, C.R., Bielefeldt-Ohmann, H., Garcia-Sastre, A., Tumpey, T.M., Van Hoven, N., Carter, V.S.,  
738 Thomas, M.J., Proll, S., Solorzano, A., Billharz, R. *et al.* (2007) Functional genomic and serological  
739 analysis of the protective immune response resulting from vaccination of macaques with an  
740 NS1-truncated influenza virus. *Journal of virology*, **81**, 11817-11827.
- 741 27. Cassatella, M.A. (1999) Neutrophil-derived proteins: selling cytokines by the pound. *Advances in*  
742 *immunology*, **73**, 369-509.
- 743 28. Sadik, C.D., Kim, N.D. and Luster, A.D. (2011) Neutrophils cascading their way to inflammation.  
744 *Trends in immunology*, **32**, 452-460.
- 745 29. Blander, J.M. (2014) A long-awaited merger of the pathways mediating host defence and programmed  
746 cell death. *Nature reviews. Immunology*, **14**, 601-618.
- 747 30. Kell, A.M. and Gale, M., Jr. (2015) RIG-I in RNA virus recognition. *Virology*, **479-480**, 110-121.
- 748 31. Kandasamy, M., Suryawanshi, A., Tundup, S., Perez, J.T., Schmolke, M., Manicassamy, S. and  
749 Manicassamy, B. (2016) RIG-I Signaling Is Critical for Efficient Polyfunctional T Cell Responses  
750 during Influenza Virus Infection. *PLoS pathogens*, **12**, e1005754.
- 751 32. Yuan, J.H., Yang, F., Wang, F., Ma, J.Z., Guo, Y.J., Tao, Q.F., Liu, F., Pan, W., Wang, T.T., Zhou, C.C. *et al.*  
752 (2014) A long noncoding RNA activated by TGF-beta promotes the invasion-metastasis cascade in  
753 hepatocellular carcinoma. *Cancer cell*, **25**, 666-681.
- 754 33. Deng, L., Yang, S.B., Xu, F.F. and Zhang, J.H. (2015) Long noncoding RNA CCAT1 promotes  
755 hepatocellular carcinoma progression by functioning as let-7 sponge. *Journal of experimental & clinical*  
756 *cancer research : CR*, **34**, 18.
- 757 34. Iwasaki, A. and Pillai, P.S. (2014) Innate immunity to influenza virus infection. *Nature reviews.*  
758 *Immunology*, **14**, 315-328.
- 759 35. Tavares, L.P., Teixeira, M.M. and Garcia, C.C. (2017) The inflammatory response triggered by  
760 Influenza virus: a two edged sword. *Inflammation research : official journal of the European Histamine*  
761 *Research Society ... [et al.]*, **66**, 283-302.

- 762 36. Durbin, R.K., Kotenko, S.V. and Durbin, J.E. (2013) Interferon induction and function at the mucosal  
763 surface. *Immunological reviews*, **255**, 25-39.
- 764 37. de Boer, W.I., Sont, J.K., van Schadewijk, A., Stolk, J., van Krieken, J.H. and Hiemstra, P.S. (2000)  
765 Monocyte chemoattractant protein 1, interleukin 8, and chronic airways inflammation in COPD. *The*  
766 *Journal of pathology*, **190**, 619-626.
- 767 38. Scapini, P., Lapinet-Vera, J.A., Gasperini, S., Calzetti, F., Bazzoni, F. and Cassatella, M.A. (2000) The  
768 neutrophil as a cellular source of chemokines. *Immunological reviews*, **177**, 195-203.
- 769 39. Qiu, L., Zhang, H., Yang, K. and Jiang, S. (2009) Molecular cloning and mRNA expression analysis of  
770 interleukin-8 gene in Japanese sea perch (*Lateolabrax japonicus*). *Molecular biology reports*, **36**,  
771 1099-1105.
- 772 40. Chu, C.Q., Lu, X.J., Li, C.H. and Chen, J. (2014) Molecular characterization of a CXCL8-like protein  
773 from ayu and its effect on chemotaxis of neutrophils and monocytes/macrophages. *Gene*, **548**, 48-55.
- 774 41. Wang, K.C., Yang, Y.W., Liu, B., Sanyal, A., Corces-Zimmerman, R., Chen, Y., Lajoie, B.R., Protacio,  
775 A., Flynn, R.A., Gupta, R.A. *et al.* (2011) A long noncoding RNA maintains active chromatin to  
776 coordinate homeotic gene expression. *Nature*, **472**, 120-124.
- 777 42. Anderson, K.M., Anderson, D.M., McAnally, J.R., Shelton, J.M., Bassel-Duby, R. and Olson, E.N.  
778 (2016) Transcription of the non-coding RNA upperhand controls Hand2 expression and heart  
779 development. *Nature*, **539**, 433-436.
- 780 43. Engreitz, J.M., Haines, J.E., Perez, E.M., Munson, G., Chen, J., Kane, M., McDonel, P.E., Guttman, M.  
781 and Lander, E.S. (2016) Local regulation of gene expression by lncRNA promoters, transcription and  
782 splicing. *Nature*, **539**, 452-455.
- 783 44. Paralkar, V.R., Taborda, C.C., Huang, P., Yao, Y., Kossenkov, A.V., Prasad, R., Luan, J., Davies, J.O.,  
784 Hughes, J.R., Hardison, R.C. *et al.* (2016) Unlinking an lncRNA from Its Associated cis Element.  
785 *Molecular cell*, **62**, 104-110.
- 786 45. Xiao, T., Liu, L., Li, H., Sun, Y., Luo, H., Li, T., Wang, S., Dalton, S., Zhao, R.C. and Chen, R. (2015)  
787 Long Noncoding RNA ADINR Regulates Adipogenesis by Transcriptionally Activating C/EBPalpha.  
788 *Stem cell reports*, **5**, 856-865.
- 789 46. Snoeks, L., Weber, C.R., Turner, J.R., Bhattacharyya, M., Wasland, K. and Savkovic, S.D. (2008)  
790 Tumor suppressor Foxo3a is involved in the regulation of lipopolysaccharide-induced interleukin-8 in  
791 intestinal HT-29 cells. *Infection and immunity*, **76**, 4677-4685.
- 792 47. Gack, M.U., Shin, Y.C., Joo, C.H., Urano, T., Liang, C., Sun, L., Takeuchi, O., Akira, S., Chen, Z.,  
793 Inoue, S. *et al.* (2007) TRIM25 RING-finger E3 ubiquitin ligase is essential for RIG-I-mediated  
794 antiviral activity. *Nature*, **446**, 916-920.
- 795 48. Liu, L., Yue, H., Liu, Q., Yuan, J., Li, J., Wei, G., Chen, X., Lu, Y., Guo, M., Luo, J. *et al.* (2016)  
796 LncRNA MT1JP functions as a tumor suppressor by interacting with TIAR to modulate the p53  
797 pathway. *Oncotarget*, **7**, 15787-15800.
- 798 49. Josset, L., Tchitchek, N., Gralinski, L.E., Ferris, M.T., Eisfeld, A.J., Green, R.R., Thomas, M.J.,  
799 Tisoncik-Go, J., Schroth, G.P., Kawaoka, Y. *et al.* (2014) Annotation of long non-coding RNAs  
800 expressed in collaborative cross founder mice in response to respiratory virus infection reveals a new  
801 class of interferon-stimulated transcripts. *RNA biology*, **11**, 875-890.
- 802 50. Winterling, C., Koch, M., Koepfel, M., Garcia-Alcalde, F., Karlas, A. and Meyer, T.F. (2014) Evidence  
803 for a crucial role of a host non-coding RNA in influenza A virus replication. *RNA biology*, **11**, 66-75.
- 804 51. Yin, Z., Guan, D., Fan, Q., Su, J., Zheng, W., Ma, W. and Ke, C. (2013) lncRNA expression signatures  
805 in response to enterovirus 71 infection. *Biochemical and biophysical research communications*, **430**,  
806 629-633.

- 807 52. Fortes, P. and Morris, K.V. (2016) Long noncoding RNAs in viral infections. *Virus research*, **212**, 1-11.
- 808 53. Ouyang, J., Zhu, X., Chen, Y., Wei, H., Chen, Q., Chi, X., Qi, B., Zhang, L., Zhao, Y., Gao, G.F. *et al.*  
809 (2014) NRAV, a long noncoding RNA, modulates antiviral responses through suppression of  
810 interferon-stimulated gene transcription. *Cell host & microbe*, **16**, 616-626.
- 811 54. Jiang M., Zhang S., Yang Z. , Lin H., Zhu J. , Liu L., Wang W., Liu S., Liu W., Ma Y. *et al.* (2018)  
812 Self-Recognition of an Inducible Host lncRNA by RIG-I Feedback Restricts Innate Immune Response.  
813 *Cell*, **173**, 1-14.
- 814 55. Brunet, A., Bonni, A., Zigmond, M.J., Lin, M.Z., Juo, P., Hu, L.S., Anderson, M.J., Arden, K.C., Blenis,  
815 J. and Greenberg, M.E. (1999) Akt promotes cell survival by phosphorylating and inhibiting a Forkhead  
816 transcription factor. *Cell*, **96**, 857-868.
- 817 56. Furukawa-Hibi, Y., Yoshida-Araki, K., Ohta, T., Ikeda, K. and Motoyama, N. (2002) FOXO forkhead  
818 transcription factors induce G(2)-M checkpoint in response to oxidative stress. *The Journal of*  
819 *biological chemistry*, **277**, 26729-26732.
- 820 57. Miyamoto, K., Miyamoto, T., Kato, R., Yoshimura, A., Motoyama, N. and Suda, T. (2008) FoxO3a  
821 regulates hematopoietic homeostasis through a negative feedback pathway in conditions of stress or  
822 aging. *Blood*, **112**, 4485-4493.
- 823 58. Jonsson, H., Allen, P. and Peng, S.L. (2005) Inflammatory arthritis requires Foxo3a to prevent Fas  
824 ligand-induced neutrophil apoptosis. *Nature medicine*, **11**, 666-671.
- 825 59. Zhao, C., Jia, M., Song, H., Yu, Z., Wang, W., Li, Q., Zhang, L., Zhao, W. and Cao, X. (2017) The E3  
826 Ubiquitin Ligase TRIM40 Attenuates Antiviral Immune Responses by Targeting MDA5 and RIG-I. *Cell*  
827 *reports*, **21**, 1613-1623.
- 828 60. Gack, M.U., Albrecht, R.A., Urano, T., Inn, K.S., Huang, I.C., Carnero, E., Farzan, M., Inoue, S., Jung,  
829 J.U. and Garcia-Sastre, A. (2009) Influenza A virus NS1 targets the ubiquitin ligase TRIM25 to evade  
830 recognition by the host viral RNA sensor RIG-I. *Cell host & microbe*, **5**, 439-449.
- 831 61. Wang, W., Yang, P., Zhong, Y., Zhao, Z., Xing, L., Zhao, Y., Zou, Z., Zhang, Y., Li, C., Li, T. *et al.*  
832 (2013) Monoclonal antibody against CXCL-10/IP-10 ameliorates influenza A (H1N1) virus induced  
833 acute lung injury. *Cell research*, **23**, 577-580.
- 834 62. Li, C., Yang, P., Sun, Y., Li, T., Wang, C., Wang, Z., Zou, Z., Yan, Y., Wang, W., Wang, C. *et al.* (2012)  
835 IL-17 response mediates acute lung injury induced by the 2009 pandemic influenza A (H1N1) virus.  
836 *Cell research*, **22**, 528-538.
- 837 63. Nelson, J.D., Denisenko, O. and Bomsztyk, K. (2006) Protocol for the fast chromatin  
838 immunoprecipitation (ChIP) method. *Nature protocols*, **1**, 179-185.
- 839 64. Chu, C., Quinn, J. and Chang, H.Y. (2012) Chromatin isolation by RNA purification (ChIRP). *Journal*  
840 *of visualized experiments : JoVE*.

841

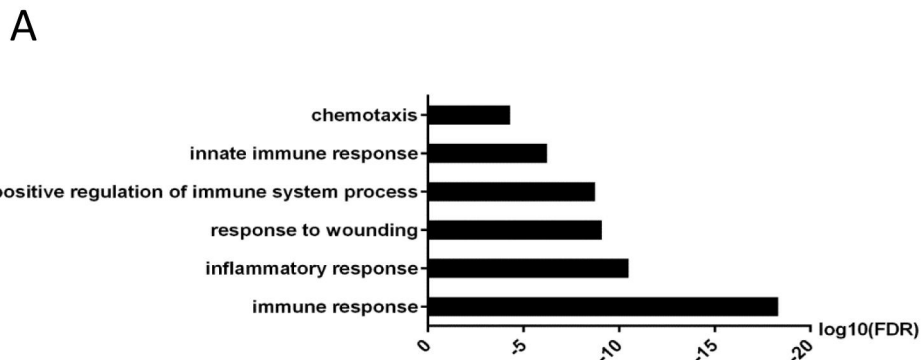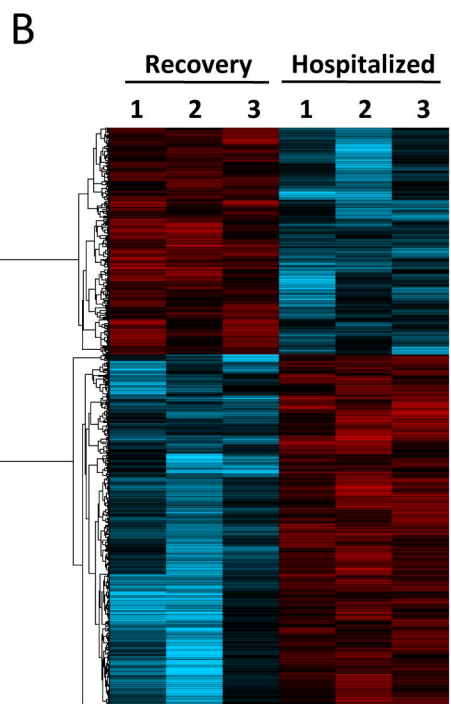

FC>2, p<0.05  
 Up-regulated: 240(164-357)  
 Down-regulated: 193(158-257)

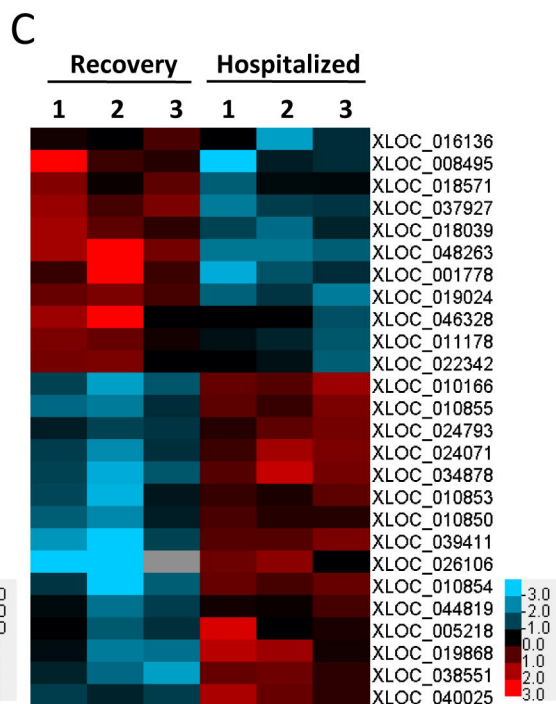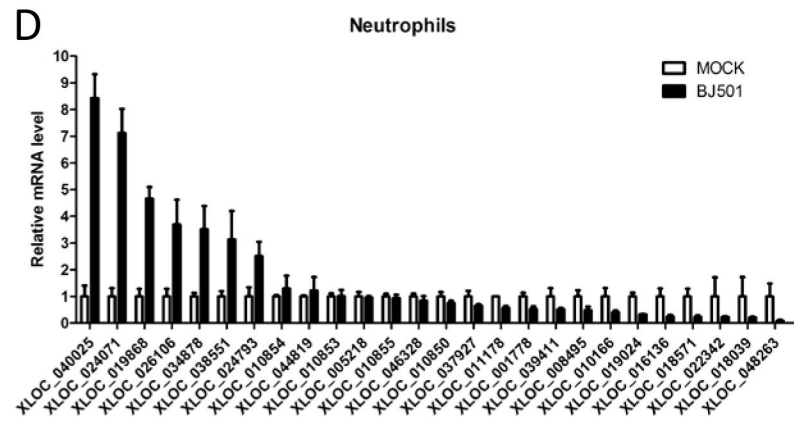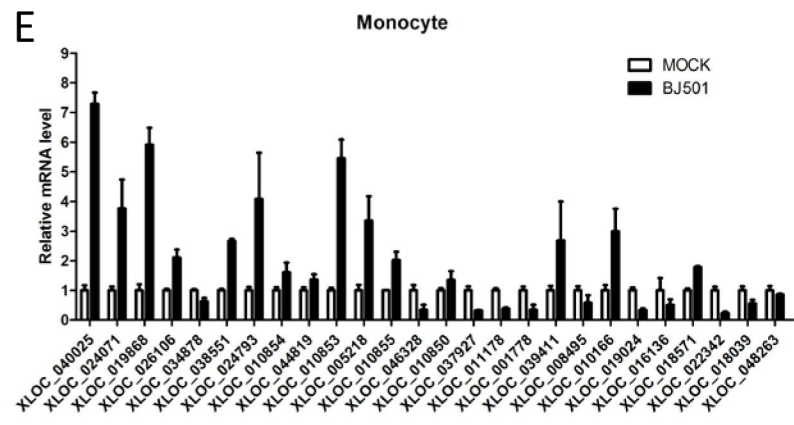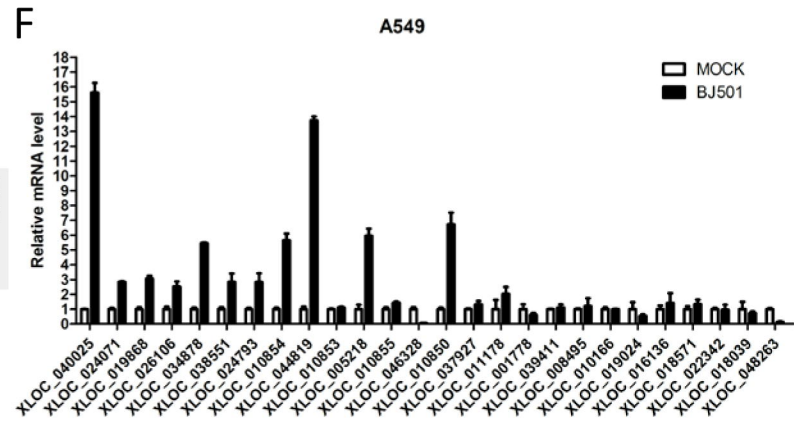

A

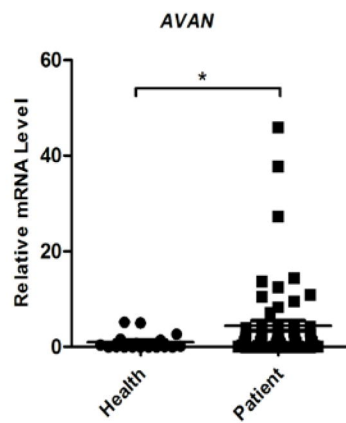

B

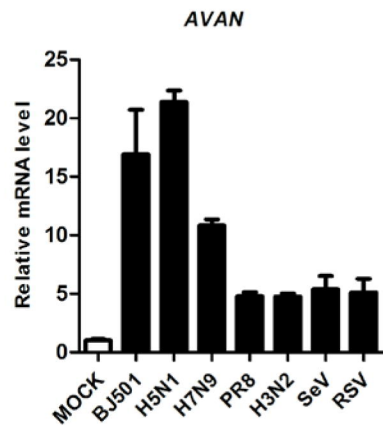

C

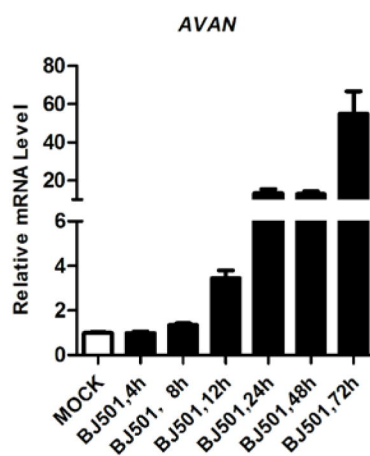

D

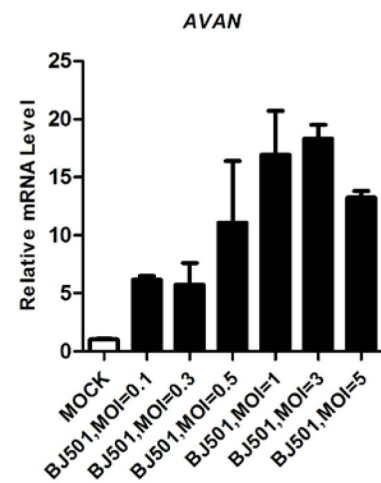

E

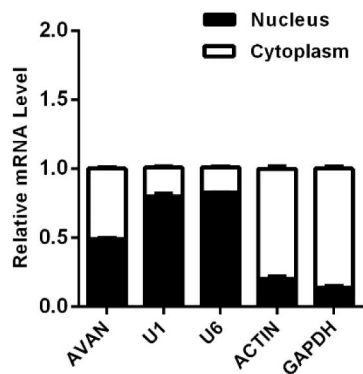

G

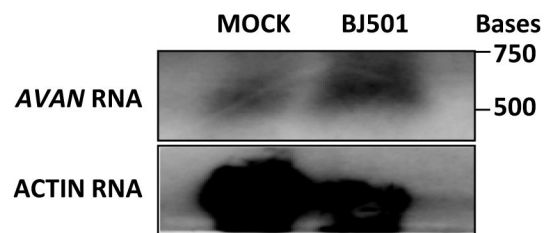

F

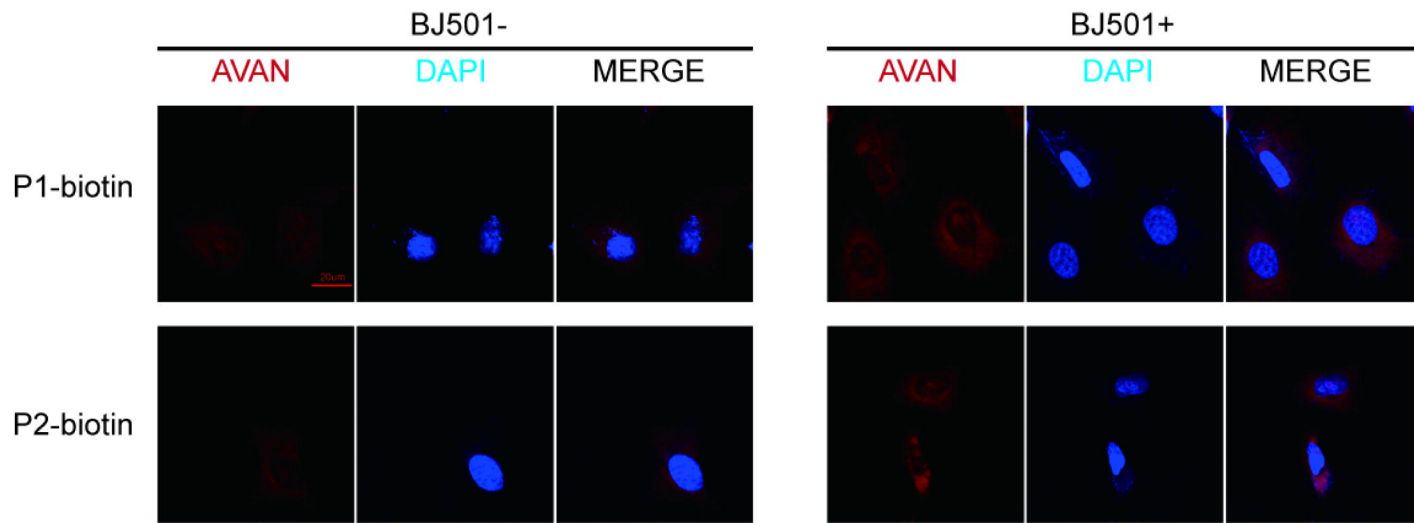

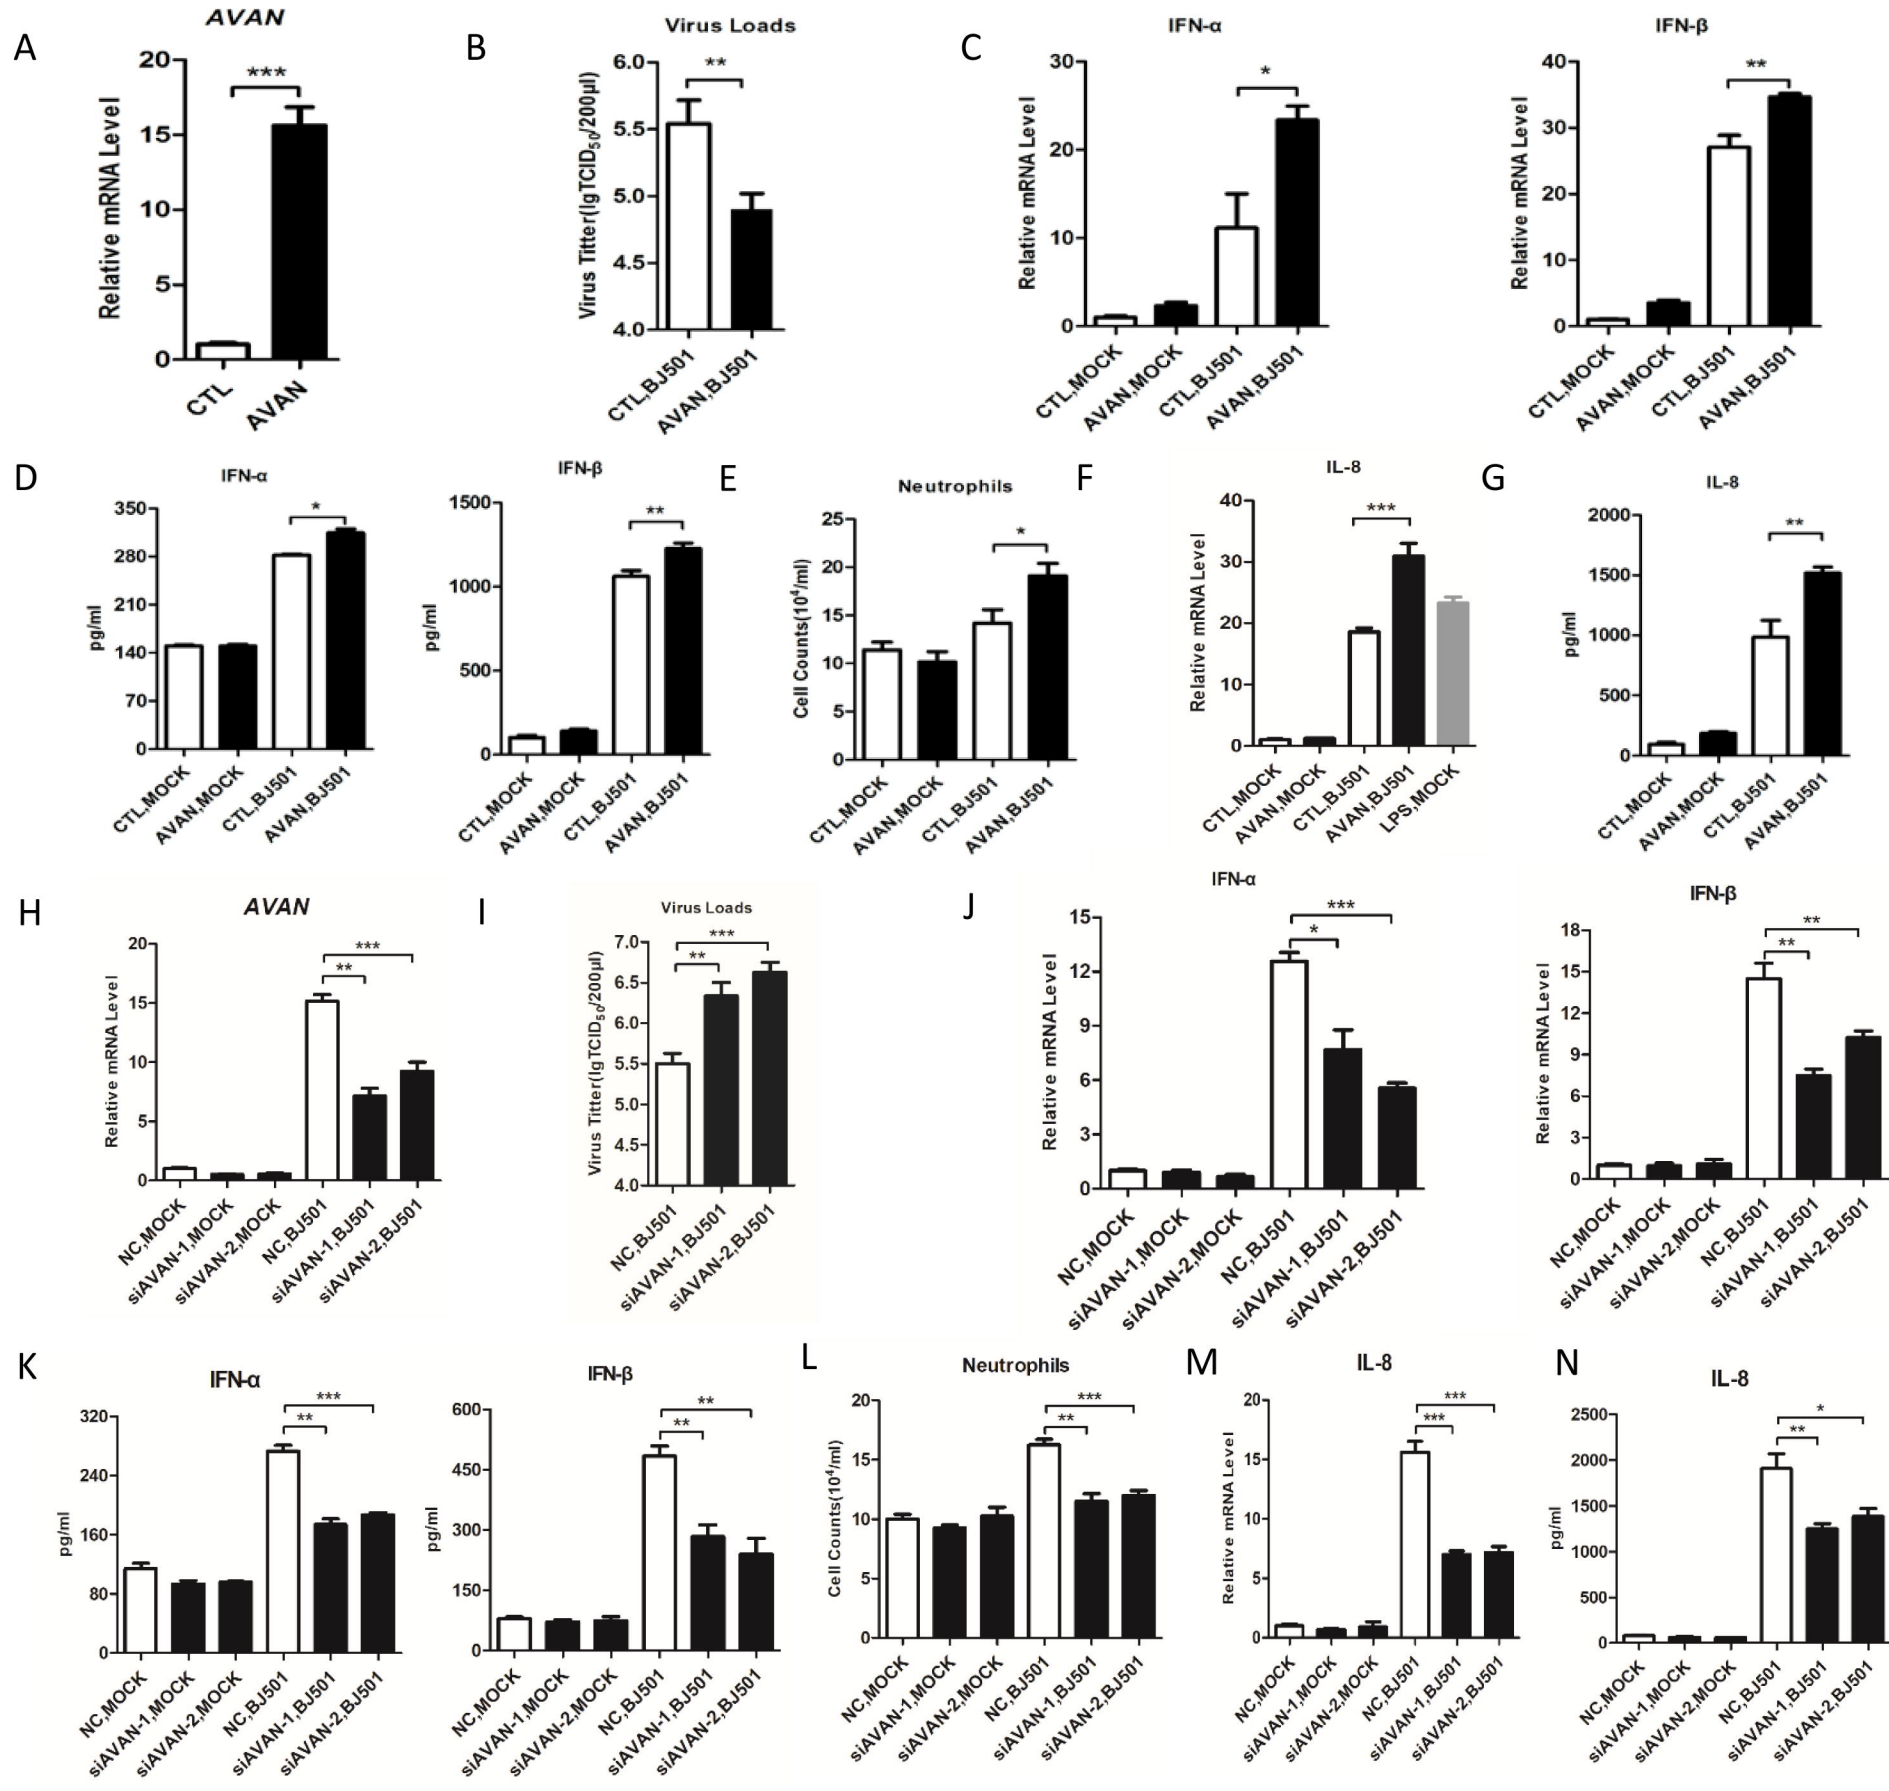

A

CTL,BJ501 AVAN,BJ501

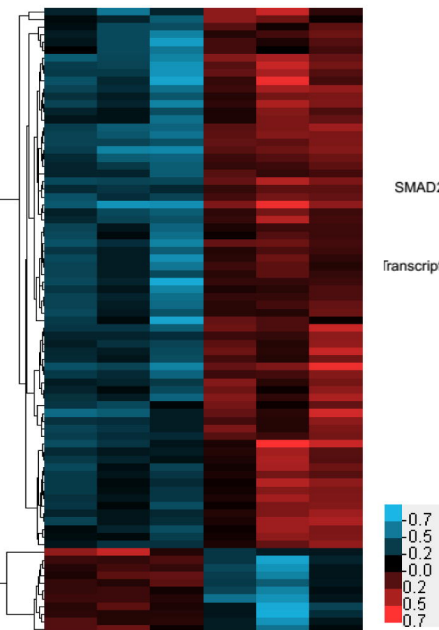

B

Significant Enriched Reactome.pathway Terms (Top 15)

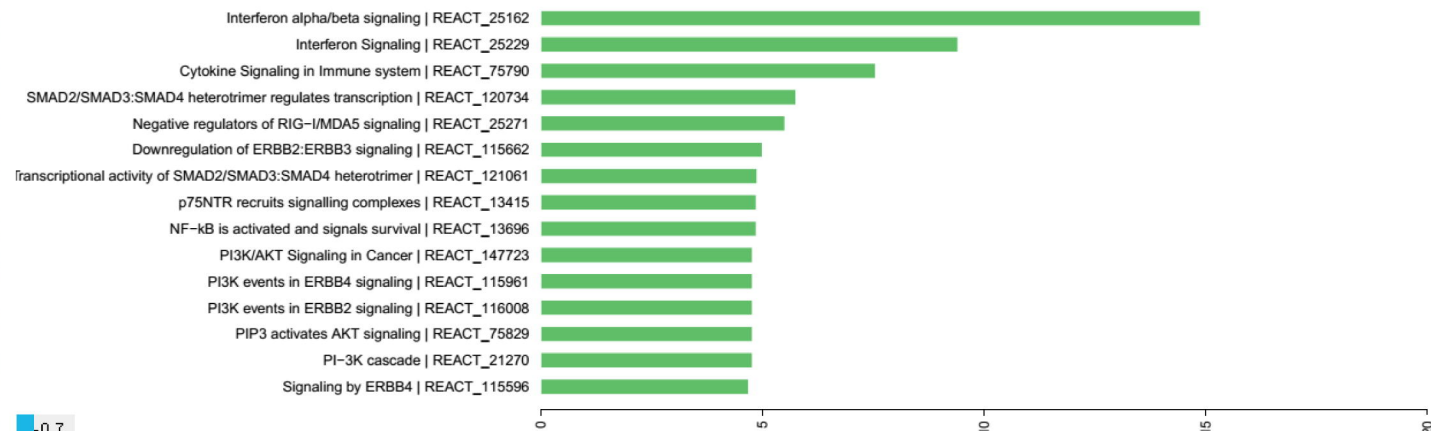

C

CTL,BJ501 AVAN,BJ501

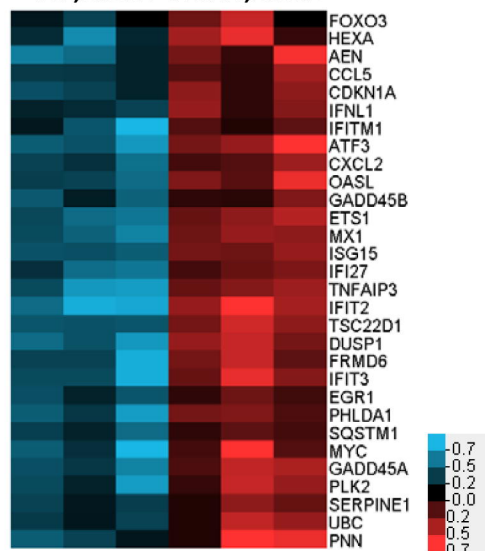

D

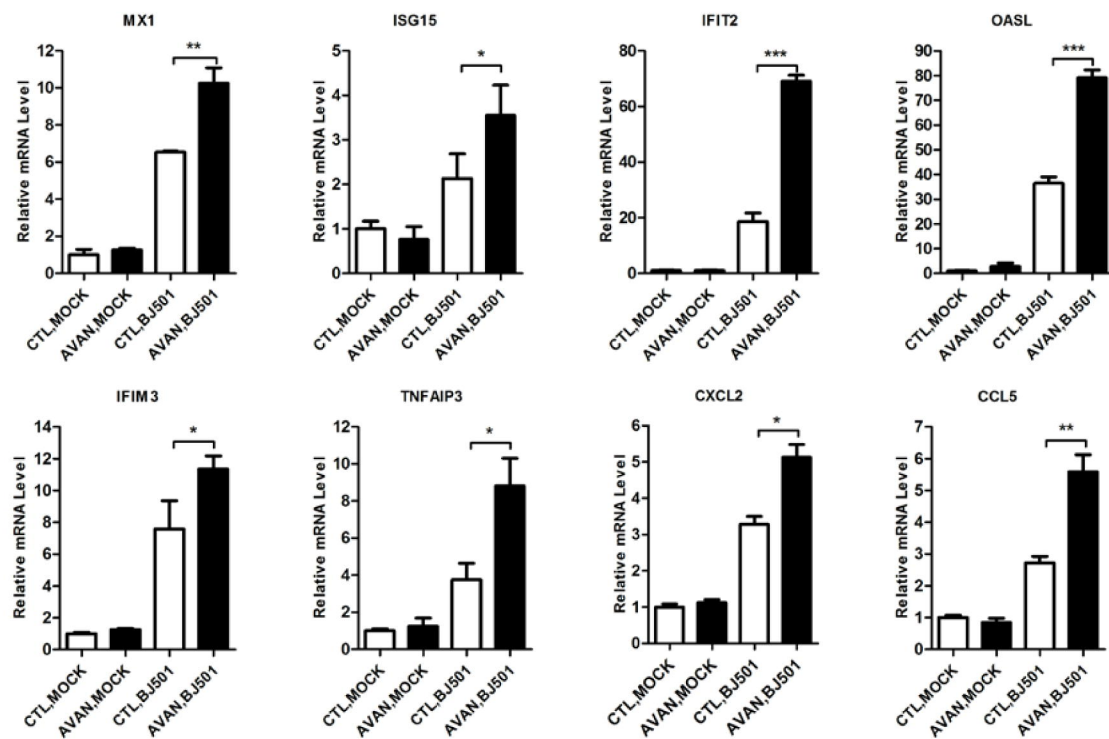



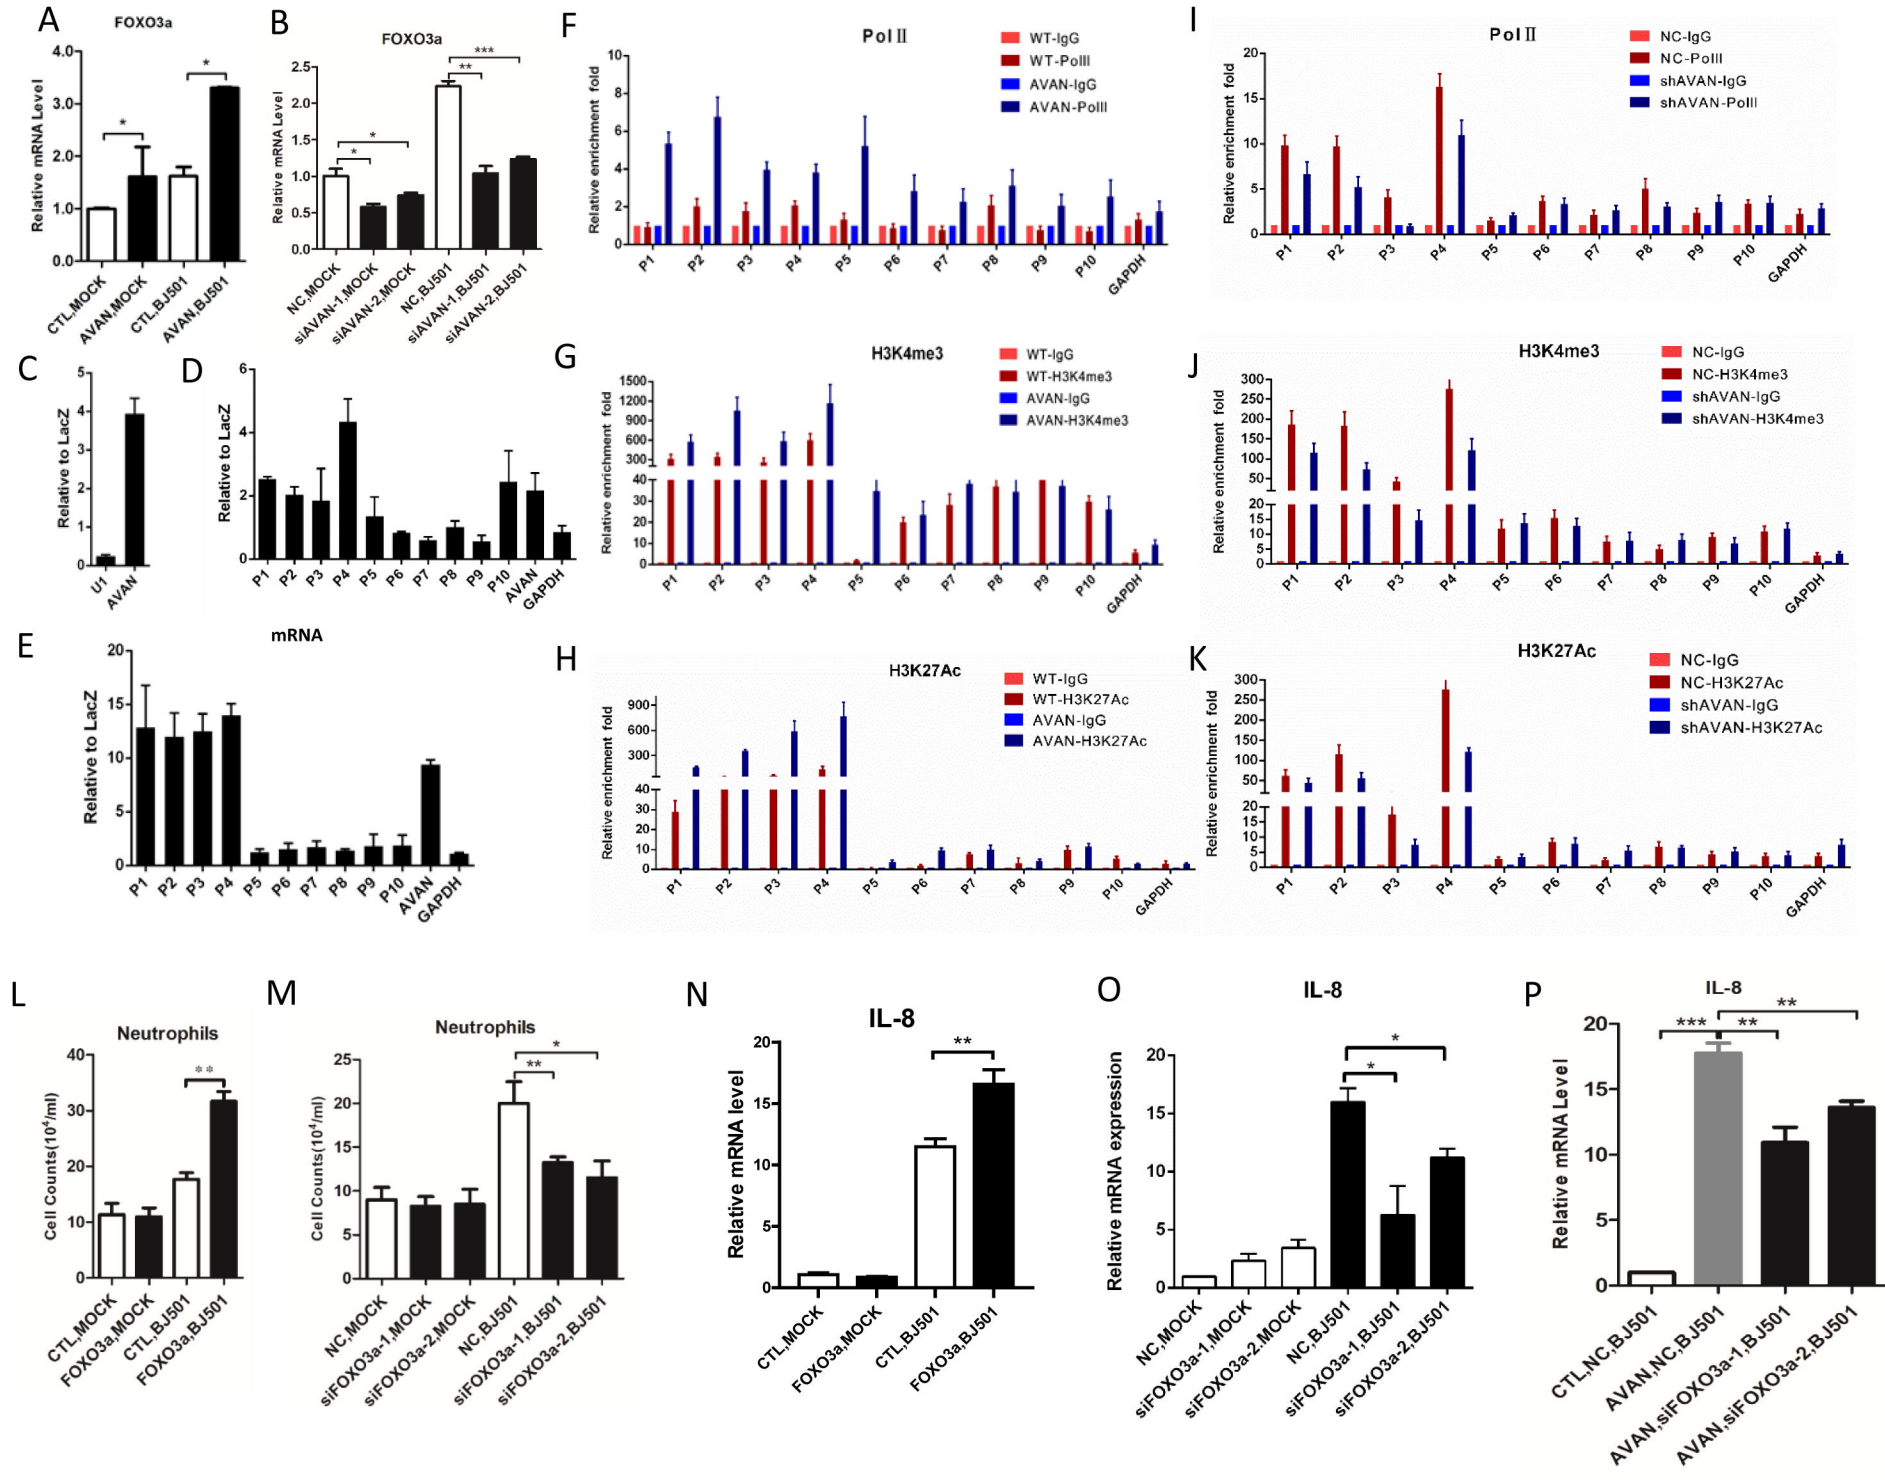

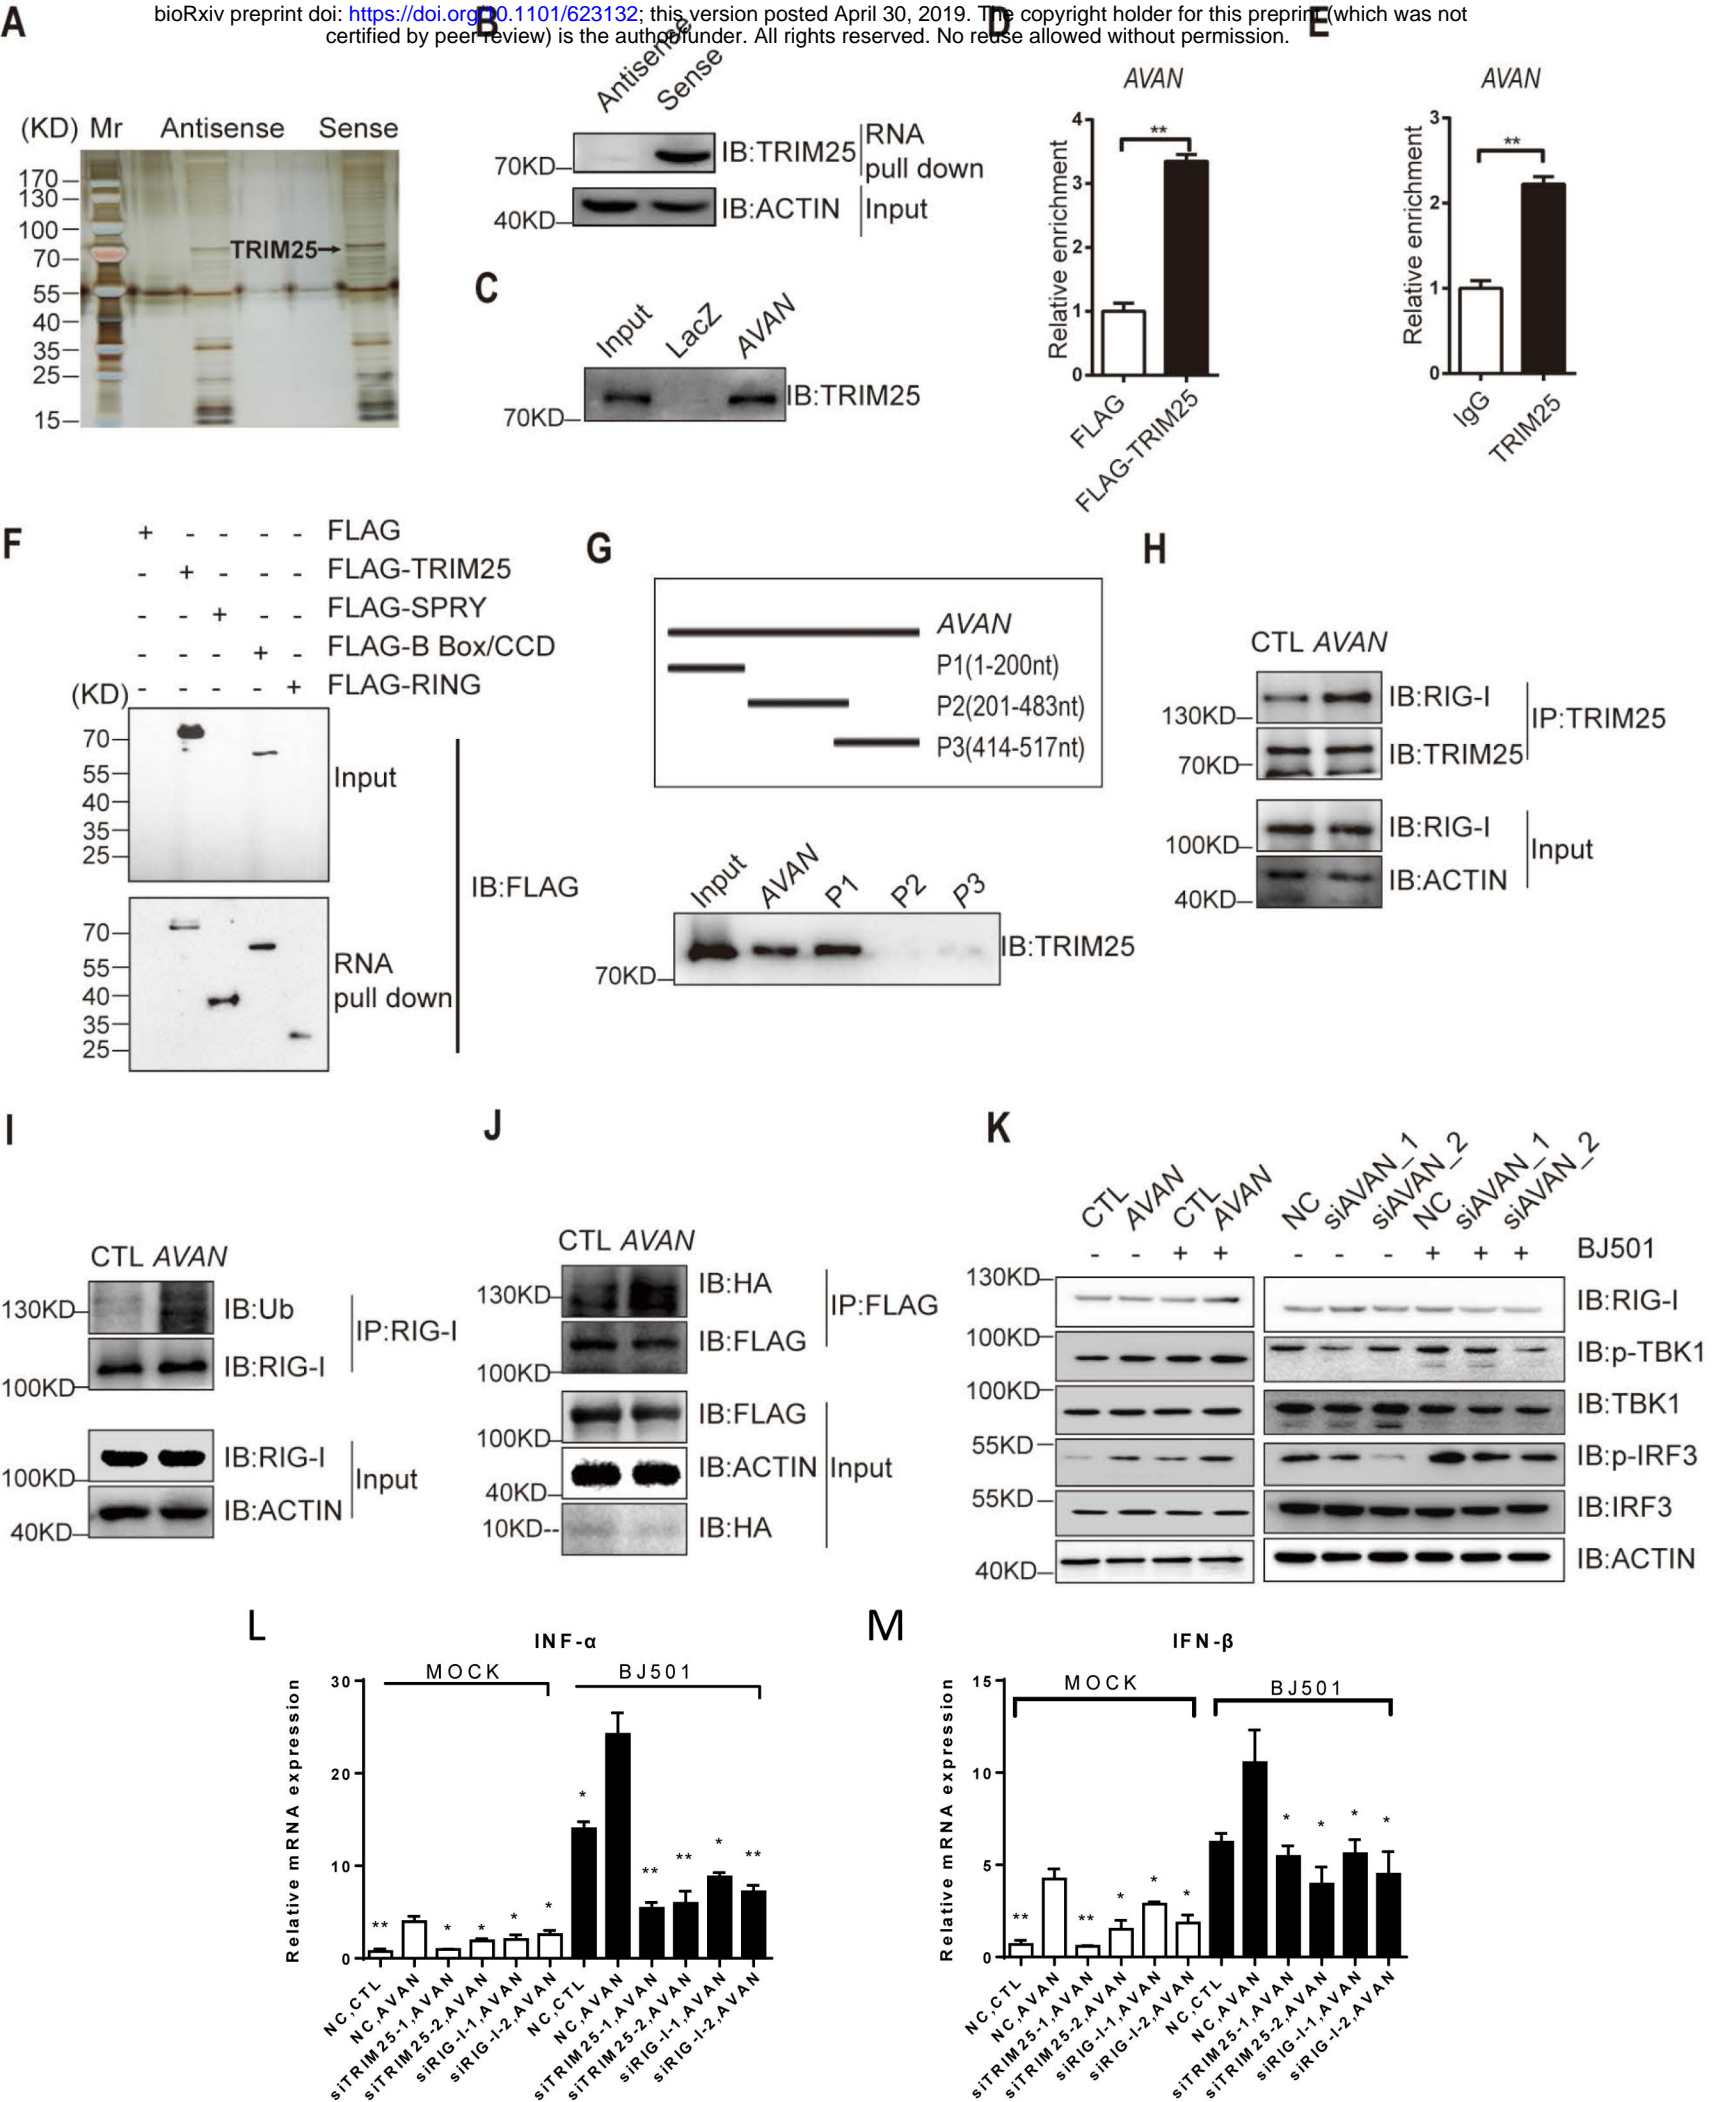

A

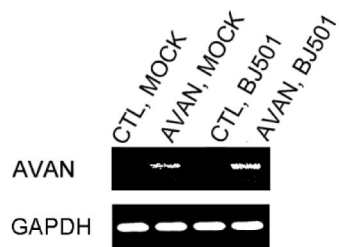

B

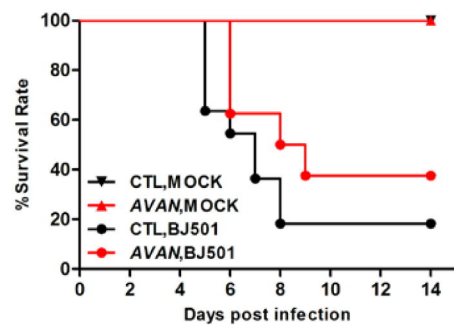

C

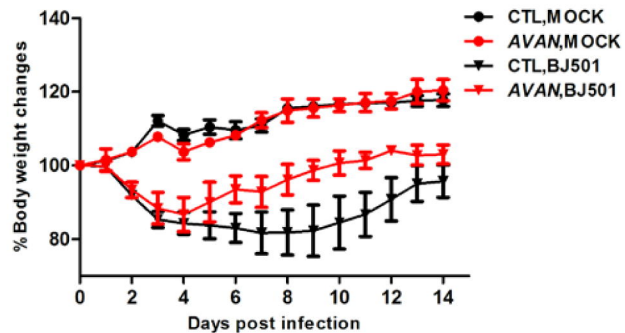

D

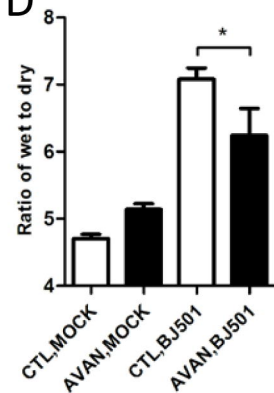

E

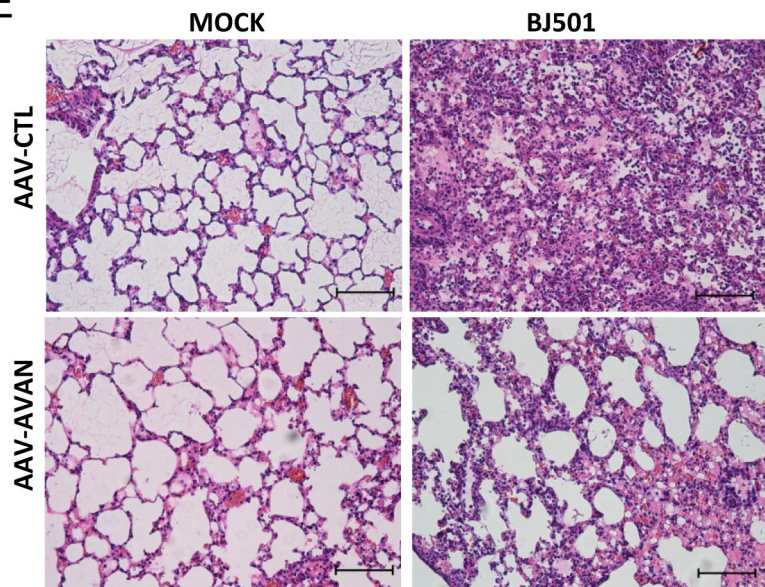

F

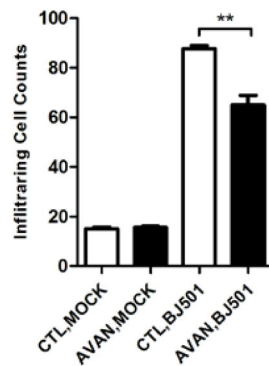

G

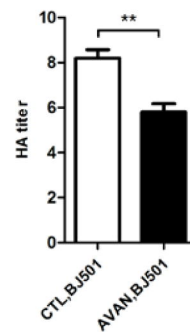

H

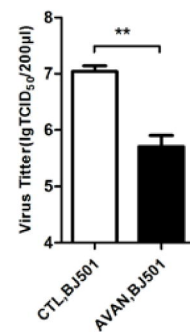

I

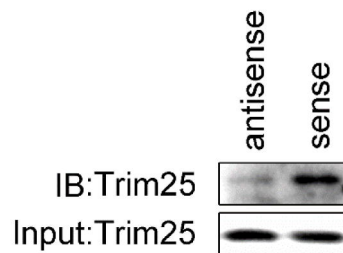

J

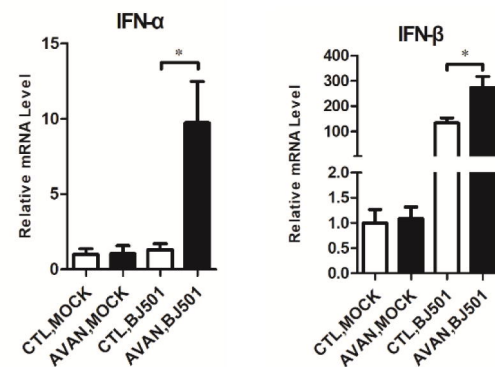

***In trans***

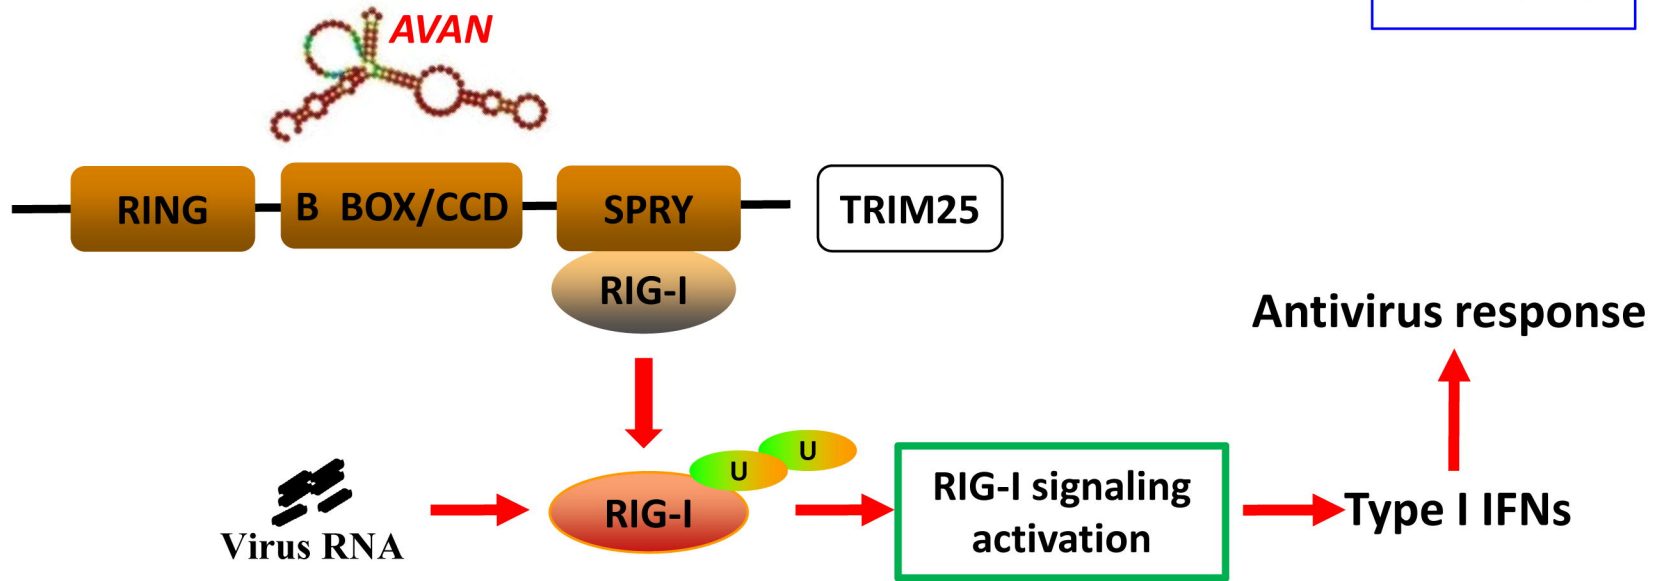

***In cis***

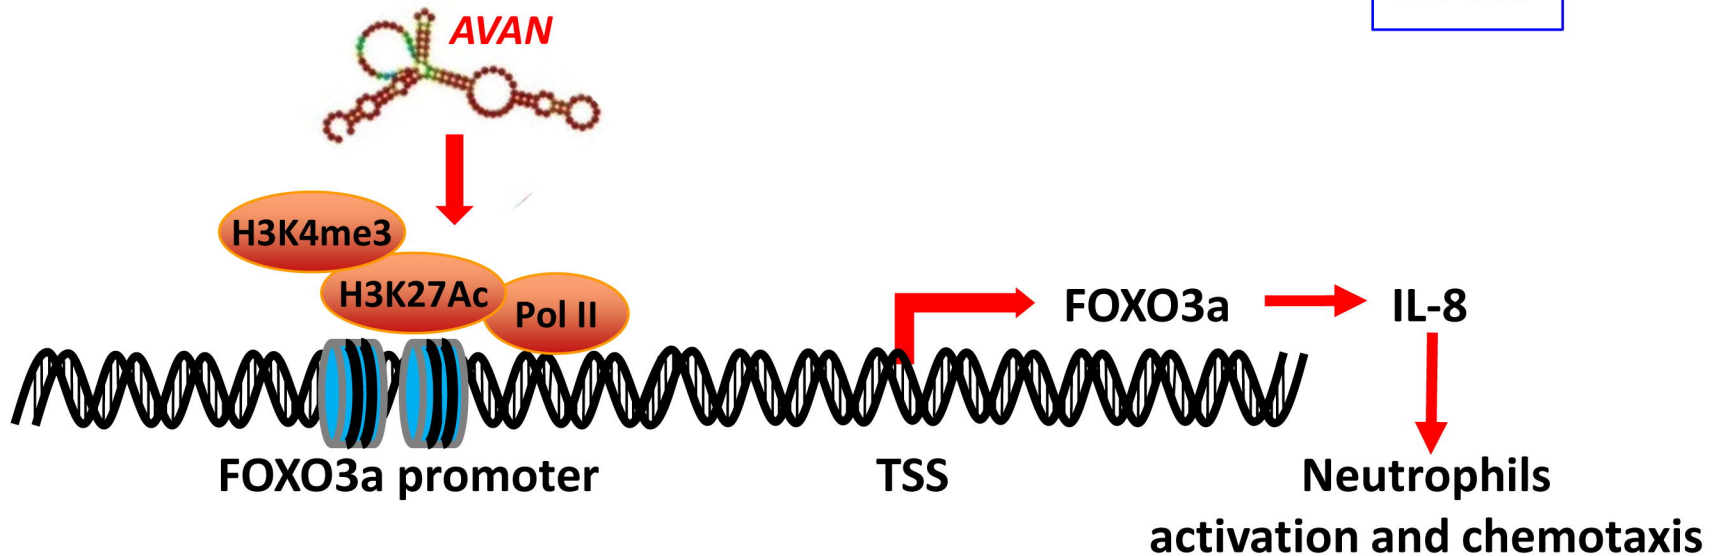

Source: https://biorxiv.org/content/biorxiv/early/2019/04/30/623132.full-text.pdf
